# Supplementary material for: Guiding Epilepsy Surgery by Intraoperatively Visualizing Proinflammatory Microglia via a Ratiometric Surface-Enhanced Raman Scattering Nanosensor
Source: Research Square preprint supplement (doi:10.21203/rs.3.rs-1868381/v1), 2023-02-15
Supplement: Supplementary file 1 [file 6a40037f5fba7f5cc7023597.pdf]

# **Guiding Epilepsy Surgery by Intraoperatively Visualizing Proinflammatory Microglia via a Ratiometric Surface-Enhanced Raman Scattering Nanosensor**

Cong Wang<sup>1,2,3,&</sup>, Zhi Li<sup>4,&</sup>, Xiao Zhu<sup>5</sup>, Yue Ding<sup>6</sup>, Wenjia Duan<sup>1</sup>, Wanbing Sun<sup>7</sup>, Yiqing Jiang<sup>1</sup>, Ming Chen<sup>4</sup>, Jiayi Hu<sup>1</sup>, Zheping Cai<sup>8,9</sup>, Jing Zhao<sup>1</sup>, Zhen Fan<sup>4</sup>, Faming Zheng<sup>10</sup>, Xingyu Zhou<sup>11</sup>, Fang Xie<sup>12</sup>, Jianping Zhang<sup>13</sup>, Yihui Guan<sup>12</sup>, Xiao Xiao<sup>8,9,\*</sup>, Liang Chen<sup>4,9,14,15,\*</sup>, Cong Li<sup>1,\*</sup> and Ying Mao<sup>4,9,14,\*</sup>

1. Key Laboratory of Smart Drug Delivery, Ministry of Education, State Key Laboratory of Medical Neurobiology, School of Pharmacy, Fudan University, Shanghai, China.
2. Academy for Engineering and Technology, Fudan University, Shanghai, China.
3. Shanghai Center for Brain Science and Brain-Inspired Technology, Shanghai, China.
4. Department of Neurosurgery, Huashan Hospital, Fudan University, Shanghai, China.
5. Department of Clinical Pharmacy and Pharmacy Administration, School of Pharmacy, Fudan University, 201203, China
6. Shanghai Mental Health Center, Shanghai Jiao Tong University School of Medicine, Shanghai, China.
7. Department of Neurology and Research Center of Neurology in Second Affiliated Hospital and Key Laboratory of Medical Neurobiology of Zhejiang Province, Zhejiang University School of Medicine, Hangzhou, China.
8. Key Laboratory of Computational Neuroscience and Brain-Inspired Intelligence, Ministry of Education; Behavioral and Cognitive Neuroscience Center, Institute of Science and Technology for Brain-Inspired Intelligence, Shanghai, China.
9. State Key Laboratory of Medical Neurobiology and MOE Frontiers Center for Brain Science, Shanghai, China.
10. State Key Laboratory of Transducer Technology, Shanghai Institute of Microsystem and Information Technology, Chinese Academy of Sciences, Shanghai, China.
11. Biomedical Engineering, Vanderbilt University, Nashville TN, USA.
12. PET Center, Huashan Hospital, Fudan University, Shanghai, China.
13. Shanghai Engineering Research Center for Molecular Imaging Probes, Shanghai, China.
14. National Center for Neurological Disorders, Shanghai, China.
15. Tianqiao and Chrissy Chen Institute for Translational Research, Shanghai, China.

&These authors contributed equally

\*Corresponding authors, maoying@fudan.edu.cn; congli@fudan.edu.cn;  
hschenliang@fudan.edu.cn; xiaoxiao@fudan.edu.cn

|                                                                    |    |
|--------------------------------------------------------------------|----|
| Materials .....                                                    | 4  |
| Immunoblotting .....                                               | 4  |
| Flow cytometric analysis.....                                      | 5  |
| Determination of hypochlorite concentration in vitro .....         | 5  |
| Synthetic route of Lip-Cy7S.....                                   | 6  |
| Synthesis of <i>Lip-NB</i> . ....                                  | 7  |
| Synthesis of <i>Lip-PEG-MAL</i> . ....                             | 7  |
| Synthesis of <i>Lip-PEG-Angiopep2</i> . ....                       | 8  |
| Radio-synthesis of <sup>99m</sup> Tc-ultraHOCl <sub>s</sub> . .... | 8  |
| Transmission electron microscopy (TEM). ....                       | 8  |
| Dynamic light scattering (DLS). ....                               | 9  |
| Tissue penetration depth study. ....                               | 9  |
| Preparation of various radical species. ....                       | 9  |
| Raman signal stability. ....                                       | 9  |
| Radio-stability. ....                                              | 9  |
| Cytotoxicity.....                                                  | 9  |
| In vitro cellular uptake studies. ....                             | 10 |
| Neuronal survival evaluation. ....                                 | 10 |
| In vivo SPECT/CT studies. ....                                     | 10 |
| Bio-distribution studies. ....                                     | 10 |
| In vivo MRI studies. ....                                          | 11 |
| In vivo PET/CT studies. ....                                       | 11 |
| Accelerating rotarod test.....                                     | 11 |
| Open field test.....                                               | 11 |
| EPM test. ....                                                     | 12 |
| Tail suspension test. ....                                         | 12 |
| Y-Maze test. ....                                                  | 12 |
| Supplementary figure 1 .....                                       | 13 |
| Supplementary figure 2 .....                                       | 14 |
| Supplementary figure 3 .....                                       | 15 |
| Supplementary figure 4 .....                                       | 16 |
| Supplementary figure 5 .....                                       | 16 |
| Supplementary figure 6 .....                                       | 17 |
| Supplementary figure 7 .....                                       | 17 |
| Supplementary figure 8 .....                                       | 18 |
| Supplementary figure 9 .....                                       | 18 |
| Supplementary figure 10 .....                                      | 19 |
| Supplementary figure 11.....                                       | 19 |
| Supplementary figure 12 .....                                      | 20 |

|                               |    |
|-------------------------------|----|
| Supplementary figure 13 ..... | 20 |
| Supplementary figure 14 ..... | 21 |
| Supplementary figure 15 ..... | 21 |
| Supplementary figure 16 ..... | 22 |
| Supplementary figure 17 ..... | 23 |
| Supplementary figure 18 ..... | 24 |
| Supplementary figure 19 ..... | 25 |
| Supplementary figure 20 ..... | 26 |
| Supplementary figure 21 ..... | 26 |
| Supplementary figure 22 ..... | 27 |
| Supplementary figure 23 ..... | 27 |
| Supplementary figure 24 ..... | 28 |
| Supplementary figure 25 ..... | 29 |
| Supplementary figure 26 ..... | 29 |
| Supplementary figure 27 ..... | 30 |
| Supplementary figure 28 ..... | 31 |
| Supplementary figure 29 ..... | 32 |
| Supplementary figure 30 ..... | 32 |
| Supplementary figure 31 ..... | 33 |
| Supplementary figure 32 ..... | 34 |
| Supplementary figure 33 ..... | 35 |
| Supplementary figure 34 ..... | 35 |
| Supplementary figure 35 ..... | 36 |
| Supplementary figure 36 ..... | 37 |
| Supplementary figure 37 ..... | 37 |
| Supplementary figure 38 ..... | 38 |
| Supplementary figure 39 ..... | 39 |
| Supplementary figure 40 ..... | 39 |
| Supplementary figure 41 ..... | 40 |
| Supplementary Table 1 .....   | 41 |
| Supplementary Table 2 .....   | 42 |
| Supplementary Table 3 .....   | 43 |
| Supplementary Table 4 .....   | 44 |
| Supplementary Table 5 .....   | 45 |
| References .....              | 45 |

**Materials.** Analytical grade solvents including methanol (CH<sub>3</sub>OH), dichloromethane (CH<sub>2</sub>Cl<sub>2</sub>), and ether were purchased from Sinopharm Chemical Reagent. Anhydrous CH<sub>2</sub>Cl<sub>2</sub> and anhydrous N,N'-dicyclohexylcarbodiimide (DMF) were purchased from Titan Scientific. Salicylhydroxamic acid (SHA) and kainic-acid (KA), were purchased from Sigma-Aldrich. A Bruker AC400 or a Bruker AC600 NMR (Bruker Daltonics, MA) was used for recording spectrometer <sup>1</sup>H NMR and <sup>13</sup>C NMR spectra. Chemical shifts of compounds were referenced to residue solvent peaks or tetramethylsilane as the internal reference and given in ppm. Electrospray ionization-high resolution mass spectra (ESI-HRMS) were obtained on an AB SCIEX TRIPLE TOF 5600+ mass spectrometer (AB Sciex, CA). Amino polyethylene glycol maleimide (NH<sub>2</sub>-PEG-Mal, Mw ≈ 5000) was provided by Shanghai Ponsure Biotech, Inc. Thiolated polyethylene glycol (SH-PEG, Mw ≈ 5000) was purchased from Beijing Jenkem Technology Company. The cysteine-modified angiopep2 peptide (TFFYGGSRGKRNNFKTEEYC, Mw = 2404.6) was purchased from Chinese Peptide Company. Fluoro-Jade B (Fjb), an anionic fluorescein derivative for staining degenerating neurons, was purchased from Chemicon International. The bicinchoninic acid (BCA) protein assay kit, 2-(4-amidinophenyl)-6-indolecarbamide dihydrochloride (DAPI), immune staining blocking buffer, intracellular staining perm wash buffer, fixation buffer, RIPA buffer and QuickBlock blocking buffer were purchased from Beyotime. The SYBR Premix Ex Taq Kit and PrimeScript™ RT Master Mix were purchased from TAKARA Bio. A Tissue RNA Purification Kit was obtained from EZBioscience. Bovine serum albumin was purchased from Solarbio Life Sciences. Super electrochemiluminescence (ECL) detection Reagent was obtained from Yeasen Biotechnology (Shanghai) Co., Ltd. Amplite™ fluorimetric hypochlorite (hypochlorous acid) assay kit was purchased from AAT Bioquest. Cell Counting Kit-8 (CCK-8) assay was obtained from Meilunbio®. Radioactive tracers <sup>18</sup>F-DPA714 and <sup>18</sup>F-FDG were obtained from Huashan Hospital PET Center and Shanghai Cancer Center, respectively. Ultrapure water (a specific resistance of 18.2 MΩ·cm<sup>-1</sup>) was used throughout the study.

**Immunoblotting.** After harvesting brain tissues or cultured cells, we lysed them with RIPA buffer with a 1% protease inhibitor cocktail. The tissues were homogenized using a tissue grinder (MX-2018, Jinxin, China) (90 Hz, 60 s). The lysed samples were centrifuged (14,000 g, 4 °C, 20 min). After determining protein concentrations with a BCA assay, we mixed the supernatants with loading buffer (5×), boiled (95 °C, 10 min), followed by cooling (0 °C, 3 min). The proteins were separated by 10% SDS PAGE and transformed to a nitrocellulose membrane in an ice bath. The membranes were blocked with 5% skimmed milk in triethanolamine buffered saline-tween (TBS-T) at r.t. for 1 h. Then we incubated the membranes with primary antibodies

overnight at 4 °C (Supplementary Table 4), followed with HRP-conjugated secondary antibodies (1:10000, YEASEN) at r.t. for 2 h. The immunoblot images were visualized on ChemiDoc™ MP Imaging System (Bio-Rad, Hercules, CA), and cumulative densitometric analyses were performed with Image J (Version 1.53k).

**Flow cytometric analysis.** For cultured cellular studies, cellular suspensions were harvested and centrifuged (2,800 g, 3 min) at 4 °C. For cell-surface marker staining, we blocked the cells with 5% BSA-PBS at r.t. for 10 min. For intracellular marker staining, the cells were permeated first, and then blocked as described above. After staining with fluorophore-conjugated primary antibodies (Supplementary Table 4) at r.t. for 20 min, the cells were fixed with fixation buffer, washed and resuspended with PBS. For tissue-based analysis, the brain tissues were collected from patients or mice, minced with scissors, and mechanically homogenated in Cell Staining Buffer (Biolegend, Cat# 420201). Single-cell suspensions were obtained by filtering with a 70- $\mu$ m membrane filter. The following procedure and antibodies used were identical to the *in vitro* flow cytometry for cells described above. Flow cytometric data were collected on a BD LSR flow cytometer (Becton, Dickinson and Company, Maryland) and analyzed using FlowJo software (Version 10.4.2).

**Determination of hypochlorite concentration *in vitro*.** For *ex vivo* HOCl measurement, fresh brain tissues were harvested and homogenized in ice-cold PBS (pH 7.4) with a ratio of 1:7 volumes (W/V) by using a tissue grinder (60 Hz, 120 s). The above solutions were ultrasound for 10 min and then centrifuged (10,000 g, 4 °C, 10 min). For cellular HOCl measurement, the harvested microglia with different phenotypes were lysed with RIPA buffer and centrifuged (10,000 g, 4 °C, 10 min). We collected the homogenate supernatants for the following tests according to the supplier's instructions. We calculated the HOCl concentration according to a calibration curve.

## Synthetic route of Lip-Cy7S

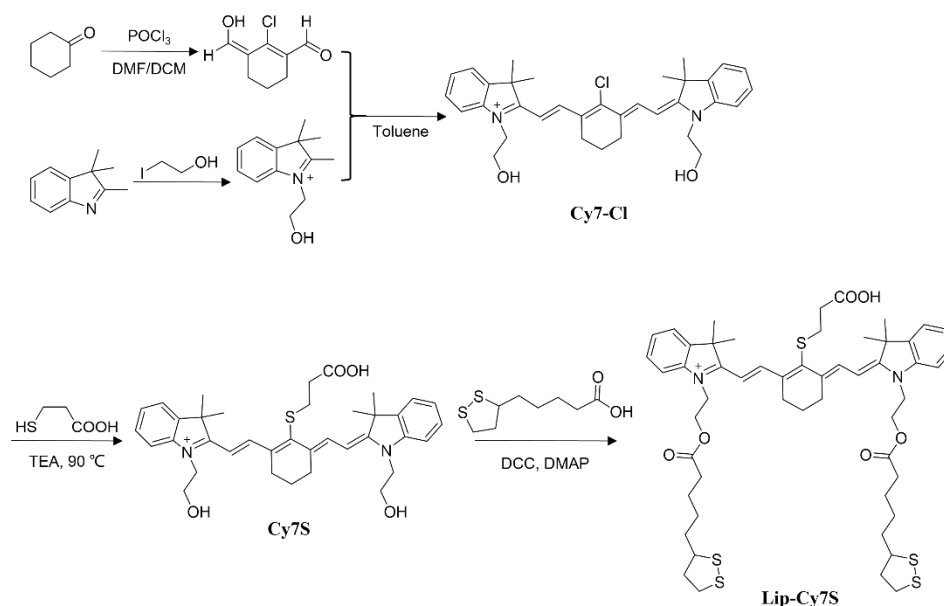

### Supplementary Scheme 1 | Synthesis of Lip-Cy7S.

**Cy7S.** The Cy7Cl was synthesized according to our previous publication<sup>1</sup>. Then the reaction material Cy7Cl (109 mg, 0.2 mmol), 3-mercaptopropionic acid (25 mg, 0.24 mmol) and triethylamine (TEA, 30 mg, 0.3 mmol) were dissolved in anhydrous DMF and stirred at r.t. for 24 h. Then the product was recrystallized in ether and obtained as green precipitate after filtrating. The solid was purified via silica gel chromatography with the gradient of CH<sub>2</sub>Cl<sub>2</sub>/CH<sub>3</sub>OH (from 50: 1 to 5: 1) to afford Cy7S as a green powder. Yield: 169.3 mg (75%). <sup>1</sup>H NMR (400 MHz, Methanol-*d*<sub>4</sub>): δ 8.90 (d, *J* = 14.2 Hz, 2H), 7.49 (dd, *J* = 7.6, 3.9 Hz, 1H), 7.43 – 7.35 (m, 2H), 7.31 (dd, *J* = 8.3, 3.8 Hz, 2H), 7.27 – 7.21 (m, 2H), 6.39 (d, *J* = 14.1 Hz, 2H), 4.26 (t, *J* = 5.1 Hz, 4H), 3.95 (t, *J* = 5.1 Hz, 4H), 3.03 (t, *J* = 7.5 Hz, 2H), 2.66 (s, 4H), 2.46 (s, 2H), 1.90 (d, *J* = 6.4 Hz, 2H), 1.76 (s, 12H). <sup>13</sup>C NMR (101 MHz, Methanol-*d*<sub>4</sub>): δ 174.90, 174.90, 158.23, 147.33, 144.27, 142.43, 134.86, 129.66, 126.14, 123.37, 112.29, 102.79, 60.05, 50.57, 47.95, 35.33, 39.03, 28.50, 27.26, 22.30. ESI-MS *m/z*: 613.2 [M]<sup>+</sup>; HR-MS *m/z*: 613.3100 (Calc. 613.3095) [M]<sup>+</sup>, C<sub>37</sub>H<sub>45</sub>N<sub>2</sub>O<sub>4</sub>S<sup>+</sup>.

**Lip-Cy7S.** The intermediate Cy7S (61 mg, 0.1 mmol), N, N'-dicyclohexylcarbodiimide (DCC, 62 mg, 0.3 mmol), 4-dimethylaminopyridine (DMAP, 37 mg, 0.3 mmol) and lipoic acid (103 mg, 0.5 mmol) were dissolved in anhydrous DMF and stirred in dark at r.t. for 18 h. The solution was removed to obtain the crude product and then purified via silica gel chromatography with the gradient of CH<sub>2</sub>Cl<sub>2</sub>/CH<sub>3</sub>OH (from 50: 1 to 5: 1) to give pure Lip-Cy7S as a dark green solid. <sup>1</sup>H NMR (400 MHz, DMSO-*d*<sub>6</sub>) δ (ppm): 8.75 (d, *J* = 14.1 Hz, 2H), 7.59 (d, *J* = 7.4 Hz, 2H), 7.50

– 7.37 (m, 4H), 7.26 (t,  $J = 7.0$  Hz, 2H), 6.43 (d,  $J = 14.2$  Hz, 2H), 4.54 (t,  $J = 4.8$  Hz, 4H), 4.46 (t,  $J = 4.8$  Hz, 4H), 3.46 (dq,  $J = 8.9, 6.2$  Hz, 2H), 3.16 – 3.00 (m, 4H), 2.97 (t,  $J = 7.1$  Hz, 2H), 2.67 (s, 4H), 2.48 (s, 2H), 2.33 (dq,  $J = 12.5, 6.2$  Hz, 2H), 2.10 (t,  $J = 7.5$  Hz, 4H), 1.84 (s, 2H), 1.77 (dt,  $J = 12.9, 6.7$  Hz, 2H), 1.68 (s, 12H), 1.55 – 1.38 (m, 4H), 1.34 – 1.26 (m, 4H), 1.18 (q,  $J = 7.6$  Hz, 4H).  $^{13}\text{C}$  NMR (101 MHz,  $\text{DMSO}-d_6$ )  $\delta$  (ppm): 172.72, 172.45, 172.45, 155.71, 145.20, 142.16, 140.73, 133.15, 128.35, 124.84, 122.36, 111.26, 101.81, 60.53, 55.87, 50.57, 48.82, 43.02, 38.06, 35.22, 33.92, 33.22, 33.00, 27.96, 27.33, 25.76, 23.79, 20.53. ESI-MS  $m/z$ : 990.2  $[\text{M}+\text{H}]^+$ ; HR-MS  $m/z$ : 989.3759 (Calc. 989.3754)  $[\text{M}]^+$ ,  $\text{C}_{53}\text{H}_{69}\text{N}_2\text{O}_6\text{S}_5^+$ .

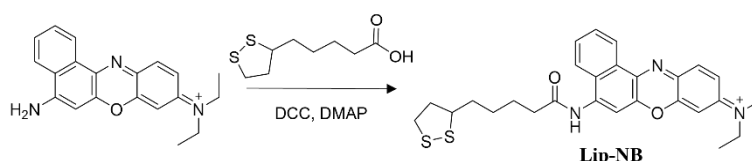

### Supplementary Scheme 2 | Synthesis of Lip-NB.

**Synthesis of Lip-NB.** Nile blue (83 mg, 0.2 mmol), O-(7-azabenzotriazol-1-yl)-N,N,N',N'-tetramethyluronium hexafluorophosphate (HATU, 91 mg, 0.24 mmol), N,N-Diisopropylethylamine (DIPEA, 39 mg, 0.3 mmol) and lipoic acid (103 mg, 0.5 mmol) were dissolved in anhydrous  $\text{CH}_2\text{Cl}_2$  and vigorously stirred at r.t. for 24 h. The reaction solution was filtered to remove the undissolved solid, and the filtrate was evaporated and chromatographed on silica gel with gradient of  $\text{CH}_2\text{Cl}_2/\text{CH}_3\text{OH}$  (changed from 100: 1 to 10: 1) to afford Lip-NB as a blue powder.  $^1\text{H}$  NMR (400 MHz,  $\text{DMSO}-d_6$ )  $\delta$  10.70 (s, 1H), 8.94 (d,  $J = 8.8$  Hz, 1H), 8.66 (s, 1H), 8.29–7.70 (m, 4H), 7.43 (s, 1H), 3.94 (s, 4H), 3.67 (dq,  $J = 8.6, 6.1$  Hz, 1H), 3.26–3.08 (m, 2H), 2.74 (t,  $J = 7.5$  Hz, 2H), 2.44 (dt,  $J = 12.4, 6.2$  Hz, 1H), 1.90 (dq,  $J = 13.4, 6.8$  Hz, 1H), 1.82–1.63 (m, 4H), 1.50 (q,  $J = 7.6$  Hz, 2H), 1.33 (t,  $J = 7.0$  Hz, 6H). ESI-MS  $m/z$ : 506.2  $[\text{M}]^+$ ; HR-MS  $m/z$ : 506.1935 (Calc. 506.1930)  $[\text{M}]^+$ ,  $\text{C}_{28}\text{H}_{32}\text{N}_3\text{O}_2\text{S}_2^+$ .

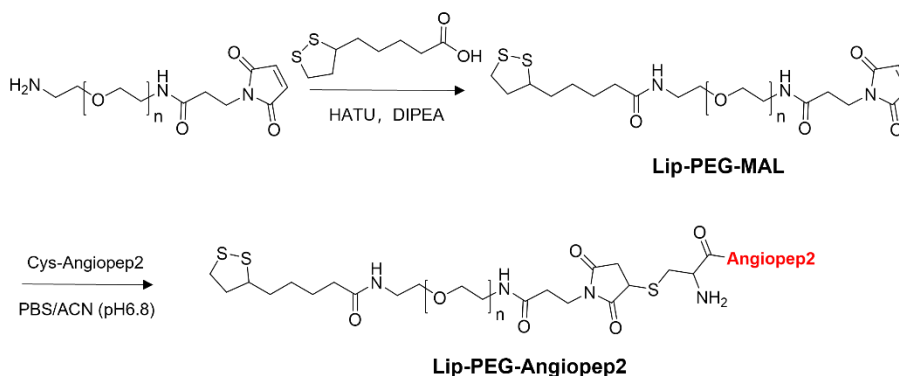

### Supplementary Scheme 3 | Synthesis of Lip-PEG-Angiopep2.

**Synthesis of Lip-PEG-MAL.** A mixture of  $\text{NH}_2$ -PEG-Mal (500 mg, 0.1 mmol), HATU (190 mg,

0.5 mmol), DIPEA (65 mg, 0.5 mmol) and lipoic acid (103 mg, 0.5 mmol) in 10.0 mL anhydrous DMF was stirred thoroughly at r.t. for 24 h. Lip-PEG-MAL was purified by dialyzing against ultrapure water followed by lyophilization.

**Synthesis of Lip-PEG-Angiopep2.** Coupling of Lip-PEG-MAL (52 mg, 10  $\mu$ mol) and cysteine-modified angiopep2 peptide (24 mg, 10  $\mu$ mol) was carried out in a mixture solution of acetonitrile/PBS (0.01 M, pH 7.4) (15:85 V/V) at r.t. Lip-PEG-Angiopep2 was purified by dialyzing against ultrapure water followed by lyophilization.

**Radio-synthesis of  $^{99m}\text{Tc}$ -ultraHOCl.** Thiol diethylenetriaminepentaacetic acid (DTPA) derivative was synthesized according to the previous work with minor modification<sup>2</sup>. Briefly, a mixture of mercaptoethylamine (3.8 mg, 50  $\mu$ mol), and DTPA dianhydride (36 mg, 0.1 mmol) in 5.0 mL anhydrous DMF was stirred thoroughly with TEA (10 mg, 0.1 mmol) at r.t. for 12 h, and the reaction solution was used for subsequent reactions without any processing. DTPA-modified ultraHOCl was synthesized with a similar procedure as ultraHOCl but added an appropriate amount of reaction solution containing the above thiol-DTPA derivative. For the radiolabeling of  $^{99m}\text{Tc}$ , DTPA-modified ultraHOCl and stannous chloride ( $\text{SnCl}_2$ , 100  $\mu$ g, pH 2.0) were added to 2 mL PBS (pH 6.5) and vortexed. Then we added freshly eluted  $^{99m}\text{Tc}$  pertechnetate (0.2–0.5 mL,  $\sim 200$  MBq) to the above mixture solution and incubated at 50  $^\circ\text{C}$  for at least 30 min. The mixed solution was purified by centrifugation (11000 rpm, 15 min) three times to remove unlabeled  $^{99m}\text{Tc}$ . We determined the radiochemical purity of  $^{99m}\text{Tc}$ -ultraHOCl by paper chromatography with Xinhua No.1 filter paper and utilized saline as the mobile phase. The sheets were analyzed with a gamma counter (SN-684, Shanghai Hesuo Rihuan Photoelectric Instrument, China) and high-performance storage phosphor screen (Cyclone; Canberra-Packard, Ontario, Canada).

**Transmission electron microscopy (TEM).** For the observation of morphology and size of ultraHOCl, TEM, high-resolution TEM (HRTEM) images and selected area electron diffraction (SAED) patterns were recorded on a JEOL 2100F (JEOL) field emission. We spotted sample aliquots on a copper grid coated with amorphous carbon and removed the excess liquid by wicking it with filter paper. The grids were then air-dried at r.t. Images of the ultraHOCl were captured using TEM operating at 300 kV and processed with the DigitalMicrograph software (Version 1.71.38). Freshly resected brain tissues were immersed into ice-cold glutaraldehyde fixing solution (special for the electron microscope, 2.5%, pH 7.2–7.4) at 4  $^\circ\text{C}$ . Samples were stored at 4  $^\circ\text{C}$  till analysis. The tissues were dehydrated, paraffin-embedded, sectioned (60–80 nm) and placed on 150 meshes cuprum grids with formvar film. TEM images were taken on a



Hitachi TEM (HT7800, Hitachi, Japan).

**Dynamic light scattering (DLS).** The size distributions and Zeta potential ( $\zeta$ -potential) of nanoparticles were measured in disposable Zeta potential cells using Malvern Zetasizer (ZS90, Malvern Instruments Ltd., UK) at 25 °C.  $\zeta$ -potential was calculated by the Zetasizer software (Version 7.11) using the Smoluchowski model.

**Tissue penetration depth study.** Fixed porcine muscles of 0–3.5 mm thickness were placed on the top of a solution containing ultraHOCIs for the Raman penetration depth measurements. The Raman intensities of ultraHOCIs were obtained by quantifying the peak 518  $\text{cm}^{-1}$ .

**Preparation of various radical species.** The hypochlorite ( $\text{OCl}^-$ ) solution was delivered from a commercial NaOCl solution (4–5%). The  $\text{H}_2\text{O}_2$  solution was delivered from a commercial solution (30%). The superoxide radical anion ( $\text{O}_2^{\bullet-}$ ) solution was prepared by dissolving commercially available  $\text{KO}_2$  in DMSO. We prepared the  $\bullet\text{OH}$  solution by the Fenton reaction from iron (II) chloride ( $\text{FeCl}_2$ ) and  $\text{H}_2\text{O}_2$ . We obtained the peroxy radicals ( $\text{ROO}^{\bullet}$ ) solution by diluting commercially available tert-Butyl hydroperoxide (t-BuOOH) in water. Equal amounts of  $\text{NaMoO}_4$  and  $\text{H}_2\text{O}_2$  were mixed to yield  $^1\text{O}_2$  of 10 mM. The NO solution was generated from sodium nitroferricyanide-(III) dehydrate in water.

**Raman signal stability.** We investigated the influence of storage time (0, 1, 2, 4, 8, 15, and 30 days) and the irradiation time (0, 1, 2, 5, 10, 30, 60, 120, 180, and 240 min) on the Raman signal stability of prepared ultraHOCIs. The intensities of Raman bands at both 518  $\text{cm}^{-1}$  and 586  $\text{cm}^{-1}$  were measured at 4 random locations.

**Radio-stability.** We added 20  $\mu\text{L}$  of  $^{99\text{m}}\text{Tc}$ -ultraHOCIs ( $\sim 0.74$  MBq) to 0.2 mL of PBS or mouse serum and incubated the mixed solution at 37 °C for 12 h. The radio-stability of  $^{99\text{m}}\text{Tc}$ -ultraHOCIs was determined at selected time points (0, 1, 4, 8, and 12 h) by paper chromatography.

**Cytotoxicity.** For *in vitro* toxicity evaluation, mouse primary microglial cells were cultured in 96-well plates at 37 °C for 12–24 h for adherence to the plates. The cells were refreshed with a culture medium containing gradient concentrations of ultraHOCIs (from 0 to 4 nM) and incubated for 24 h. Subsequently, 10  $\mu\text{L}$  CCK-8 reagent was added and co-cultured for another 4 h. We measured the optical density with a Synergy HTX Multi-Mode Reader (HTX, BioTek Gen5, Vermont) at 450 nm. For *in vivo* toxicity evaluation, we intravenously injected ultraHOCIs into four healthy mice at a dosage of 800 nmol/kg, while another group of four mice injected with an equal volume of PBS was used as control. The mice were observed and weighed every few days for 28 d. The blood was collected at 28 d post-injection, and centrifugated to obtain

the supernatant for biochemical analysis. The mice were euthanized and major viscera were harvested and stained with haematoxylin and eosin (H&E).

***In vitro* cellular uptake studies.** Primary microglial cells were seeded into 6-well-plates and incubated for 12–24 h for adherence to the plates. Then the media were supplemented with IFN $\gamma$  (100 ng/mL) plus LPS (600 ng/mL) or isometric PBS. The media were refreshed with a culture medium containing ultraHOCIs (0.4 nM) and incubated for 0.5, 2, 4 and 8 h. After washing with PBS three times, we collected the cells for Raman spectra acquisition.

**Neuronal survival evaluation.** Fluoro Jade B (FJB) staining studies were performed to identify degenerated neurons<sup>3</sup>. Briefly, the dewaxed paraffin sections (5  $\mu$ m thickness) were rehydrated with an ethanol solution and potassium permanganate, followed by rinsing with ultrapure water. The sections were then stained with a solution containing 0.001% FJB. Images were captured using a META confocal laser scanning microscope (LSM 710, Carl Zeiss, Germany). We calculated the number of FJB-positive neuronal cells in the hippocampus. Nissl staining studies were performed to evaluate survived neurons. The 5- $\mu$ m paraffin-embedded slices were dewaxed, hydrated, and then stained with 1% cresyl violet solution. After dehydrating with ethanol, washing with ultrapure water, and clearing with xylene, slices were sealed with neutral gum. We acquired the images with an optical microscope (Olympus BX51, Olympus, Japan) and counted the number of surviving intact hippocampal pyramidal cells.

***In vivo* SPECT/CT studies.** KA models (n = 4 for acute phase, n = 4 for chronic phase) and sham models (n = 4) were used for SPECT/CT imaging after injecting intravenously <sup>99m</sup>Tc-ultraHOCIs (5.6–7.4 MBq) at 0.5, 2, and 12 h, respectively. Mice were anesthetized with 1–2% isoflurane during the scanning period. Small animal SPECT/CT scans were performed on a nanoScan@SC SPECT/CT system (Mediso Medical Imaging System, Hungary) equipped with four high-resolution conical collimators with multi-pinhole plates. Acquisition parameters of CT image: x-ray tube, 0.98 mA 50 kVp; exposure time, 300 ms; 720 projections in all. SPECT was acquired under the standard mode using the following parameters: energy peak, 140 keV; full width, 20%; resolution, 1 mm/pixel; matrix, 256  $\times$  256; scan time, 30 s/projection; 128 projections in all. All acquired data were reconstructed and analyzed using dedicated fusion software (Version 3.00.021.000).

**Bio-distribution studies.** KA models (n = 12 for acute phase, n = 12 for chronic phase) and sham models (n = 12) were intravenously injected with <sup>99m</sup>Tc-ultraHOCIs (1.85–5.55 MBq). The mice were sacrificed at 0.5, 2 and 12 h post-administration and tissues of interest were excised and weighed. We measured the radioactivity with a gamma counter (SN-684, Shanghai Hesuo

Rihuan Photoelectric Instrument Co., Ltd., Shanghai, China). The decay-corrected radioactivity was calculated and radioactivity uptake of  $^{99m}\text{Tc}$ -ultraHOCl<sub>s</sub> was expressed as the percentage of the injected dose per gram of tissue (% ID/g).

***In vivo* MRI studies.** The MRI studies were performed on a 7.0 T small animal MR scanner (PharmaScan; Bruker Biospin, Billerica, MA) with a 38-mm-internal-diameter transmit/receive quadrature volume radiofrequency coil. T2W images were acquired using a turbo-rapid acquisition with relaxation enhancement (RARE) sequences with the following parameters: time of repetition/time of echo = 2500/33 ms, acquisition matrix =  $256 \times 256$ ; number of excitation = 4, field of view =  $20 \times 20$  mm; number of slices = 9; slice thickness = 0.8 mm, rare factor = 8.

***In vivo* PET/CT studies.** For the  $^{18}\text{F}$ -FDG experiment, mice were fasted for more than 6–12 h before image acquisition. PET/CT images were acquired with an Inveon micro-PET/CT (Preclinical Solutions; Siemens Healthcare Molecular Imaging, Knoxville, TN). Each mouse received  $7.4 \pm 0.3$  MBq  $^{18}\text{F}$ -FDG via the tail vein injection. Isoflurane (1–2%) in oxygen was used to anesthetize the mouse for the duration of imaging. The CT images were firstly acquired under the following parameters: 120 projections per bed position,  $360^\circ$  of rotation, 500  $\mu\text{A}$  anode source transmitting 80 keV X-ray with an exposure time of 300 ms, X-ray detector of  $3072$  transaxial pixels  $\times$   $2048$  axial pixels. 15-min static PET scans were then acquired in list mode. The PET images were reconstructed using a Fourier rebinning and ordered subsets expectation maximization 3D algorithm. Reconstructed computed tomography and PET images were fused and analysed using Inveon Research Workplace software.

**Accelerating rotarod test.** The accelerating rotarod behavioral test was used for testing motor function (Yiyao Technology, China). The parameters used in the tests include start speed (1 rpm), acceleration (accelerate 0.5 rpm/s), and highest speed (40 rpm). Each mouse underwent four consecutive trials with a rest period of 30 min between each trial. The mean latency time to fall off the rotating rod for the last two trials was used for analysis.

**Open field test.** Anxiety-like behavior and locomotor activity were measured using an open field test. Mice were initially placed in one corner of the open field apparatus (40 cm length  $\times$  40 cm width  $\times$  35 cm height) (Noldus Information Technology, Netherlands) and recorded for 10 min. Total distance traveled, total velocity, velocity in the edge were used as measures of locomotor behavior. The entrance frequency, duration, and distance traveled in the center area (20  $\times$  20 cm) were used as measures of anxiety-like behavior.

**EPM test.** The EPM test was performed to measure spontaneous locomotor and anxiety-related behavior in yet a second way. Mice have a natural tendency to actively explore a new environment, but fear open areas. The apparatus used for the EPM test consisted of two closed arms and two open arms (35 cm length  $\times$  5 cm width  $\times$  30 cm height) (Noldus Information Technology, Netherlands) joined perpendicularly and raised 1 m from the ground. Mice were individually placed in the center of the apparatus and were allowed to freely explore the EPM for 5 min. Quantification of total distance, total velocity, and the number of total entries were used for locomotor evaluation. The percentage of open arm entries, the number of entries in open arms, and the average duration in the open arms were analyzed for evaluating anxiety-related behavior.

**Tail suspension test.** The depression-like behavior was evaluated by a tail suspension test. Briefly, mice were suspended by fixing their tail with medical tape from a hook connected with the horizontal steel wire. The mice were hung upside down approximately 15 cm above the ground covered with a soft sponge panel. The activity of the tested mice was recorded for 6 min using a video camera and the immobility time was scored for the last 4 min of the session.

**Y-Maze test.** The spatial-dependent working memory was evaluated by the Y-Maze test. The theoretical basis of test is the innate tendency of rodents to alternate between exploring different arms of a Y-maze. The apparatus used for the test consisted of three closed arms [(35 cm (length)  $\times$  5 cm (width)  $\times$  25 cm (wall height))]. Mice were initially placed into the center of Y-maze and were allowed to freely explore the three arms of the maze for 5 min. Prefrontal cortex-dependent cognitive impairment was evaluated by quantification of the percentage of spontaneous alternation, spontaneous alternation, the number of incorrect alternations, the number of perseverations, the total number of arm entries, and total distance.

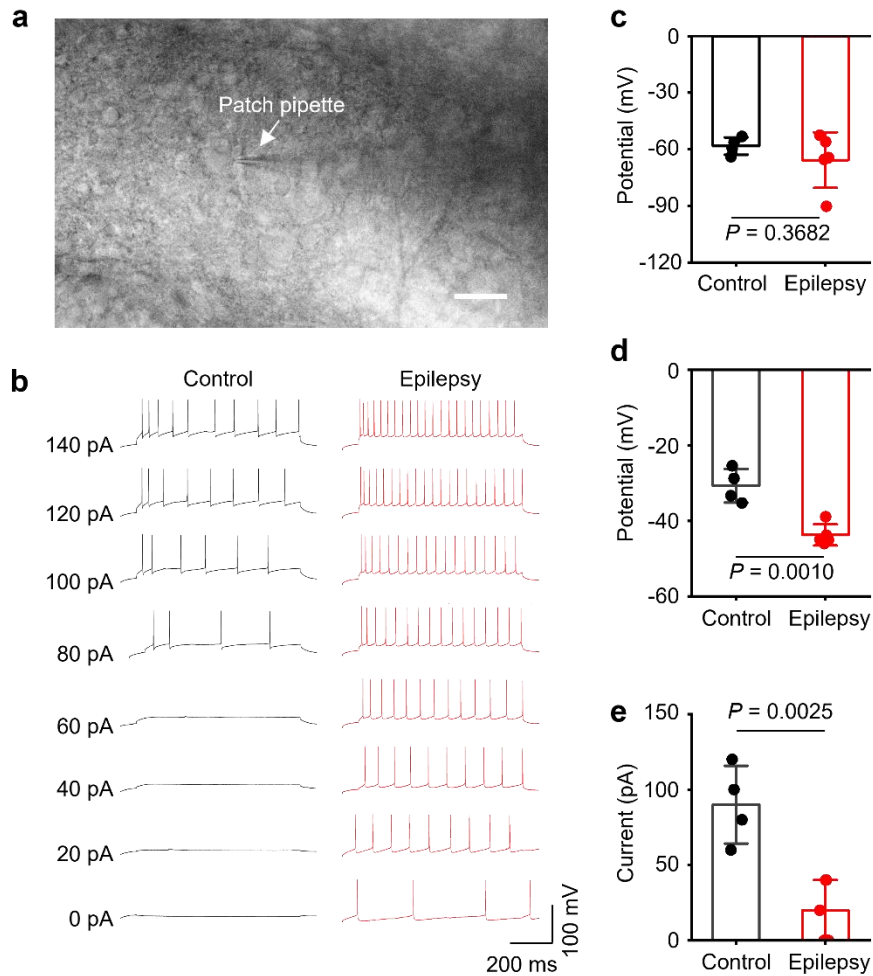

**Supplementary figure 1 | Neuron hyperexcitability is recorded from the resected brain tissues from DRE patients.** **a**, A bright-field image of a patch pipette attached to the membrane of the neuron in neocortical slices derived from a 22-year-old DRE patient with complex partial seizure. Scale bar, 50  $\mu\text{m}$ . **b**, Representative action potential (AP) trains induced by injecting increased currents (from 0-pA to 140-pA with an increment of 20 pA). **c–e**, Statistical analysis of resting membrane potential (**c**), AP threshold (**d**) and rheobase (**e**) recorded in resected brain tissues derived from patients with DRE and patients without a history of seizures. Data are presented as the mean  $\pm$  s.d. ( $n = 4$  for control patients,  $n = 5$  for epileptic patients).  $P$  values were analysed by two-tailed unpaired Student's  $t$ -tests.

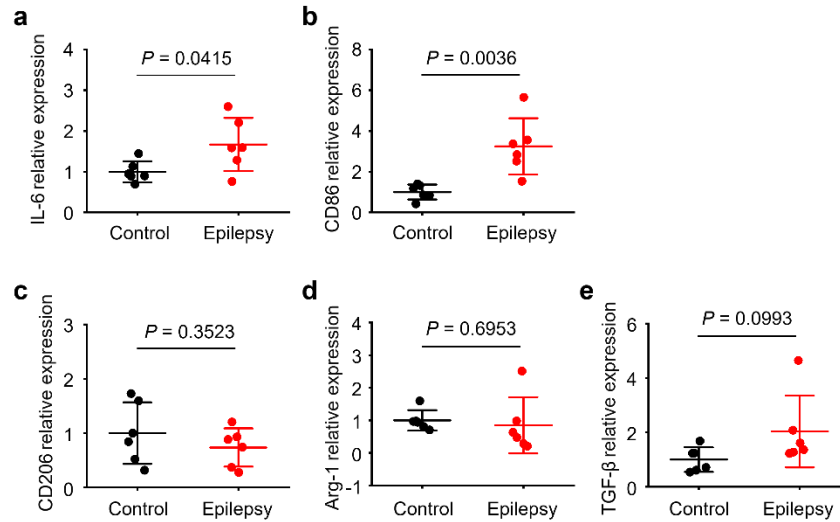

**Supplementary figure 2 | mRNA expression of phenotypic markers in epileptic and control brain tissues. a–e,** Relative mRNA expression of proinflammatory cytokines IL-6 (**a**) and biomarker CD86 (**b**), anti-inflammatory biomarker CD206 (**c**), anti-inflammatory cytokines Arg-1(**d**) and TGF- $\beta$  (**e**) in resected brain tissues from DRE patients and patients without a history of seizures (n = 6 biologically independent experiments). Data are presented as the mean  $\pm$  s.d. *P* values were analysed by two-tailed unpaired Student's *t*-tests.

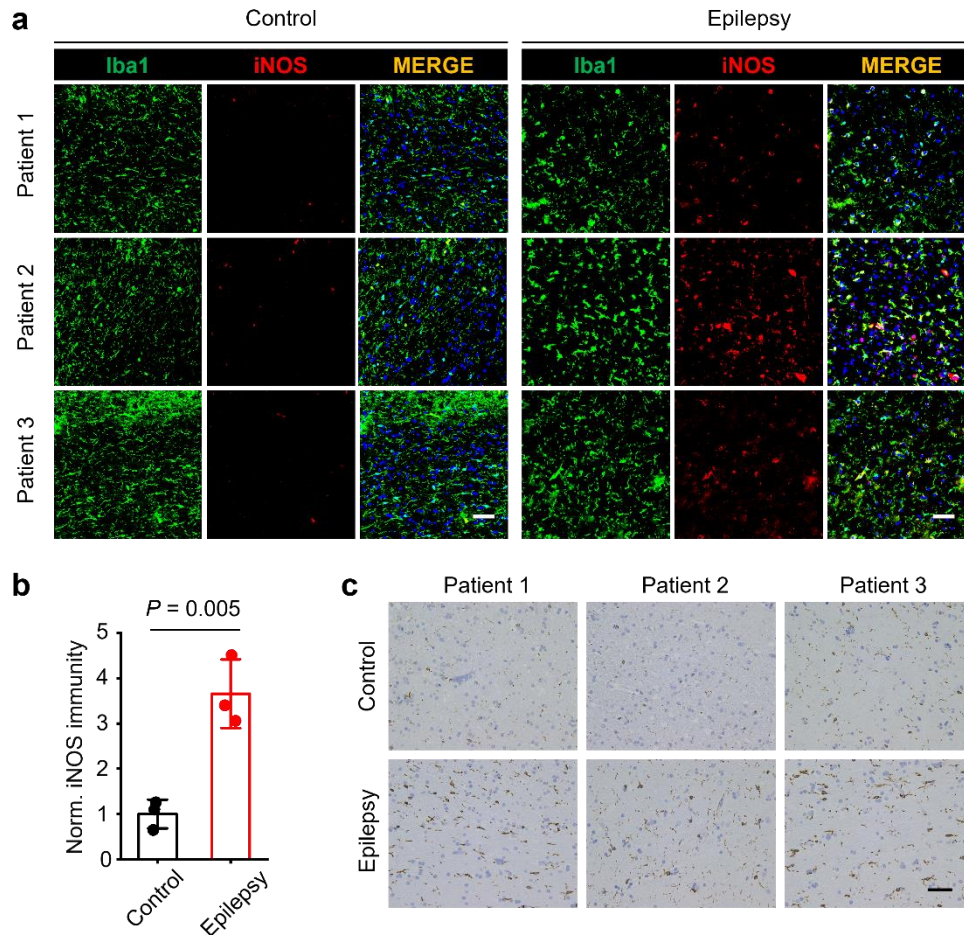

**Supplementary figure 3 | Proinflammatory microglia are found in the lesions of DRE patients.** **a**, Coimmunostaining for Iba1 and iNOS in human surgically resected tissues. Scale bar, 50  $\mu$ m. **b**, Quantification of iNOS staining in Iba1-positive microglia by ImageJ (n = 3 biologically independent experiments). **c**, Immunohistochemistry of Iba1 in excised tissues from patients with DRE and patients without a history of seizures. Scale bar, 50  $\mu$ m. Data are presented as the mean  $\pm$  s.d. *P* values were analysed by two-tailed unpaired Student's *t*-test.

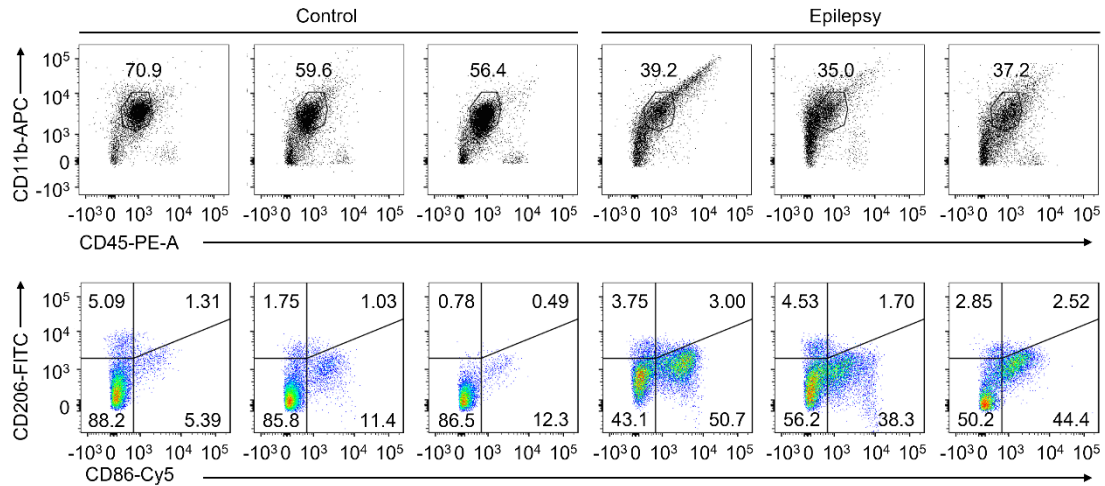

**Supplementary figure 4 | Proinflammatory microglia activation is found in the lesions of DRE patients.** Flow cytometry images of microglia (CD11b<sup>+</sup>CD45<sup>mid+</sup>) and pro-inflammatory microglia (CD86<sup>+</sup>CD11b<sup>+</sup>CD45<sup>mid+</sup>) in resected brain tissues from DRE patients and patients without a history of seizures (n = 3 biologically independent samples).

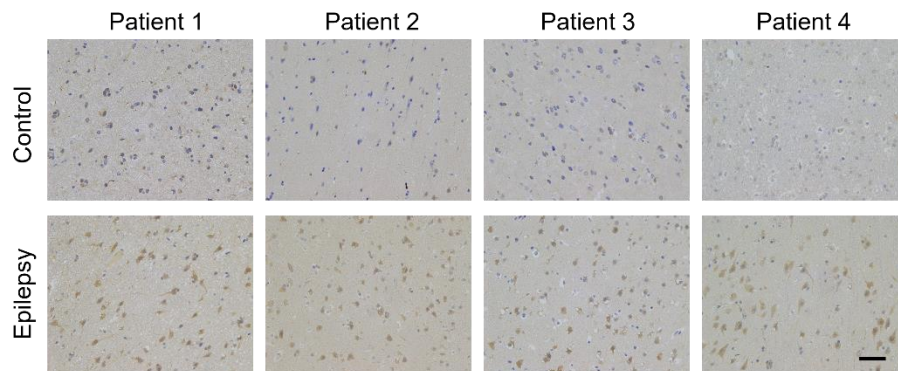

**Supplementary figure 5 | Upregulated MPO expression is found in the lesions of DRE patients.** Immunohistochemistry images of MPO in excised tissues from patients with DRE and patients without a history of seizures. Scale bar, 50  $\mu$ m.



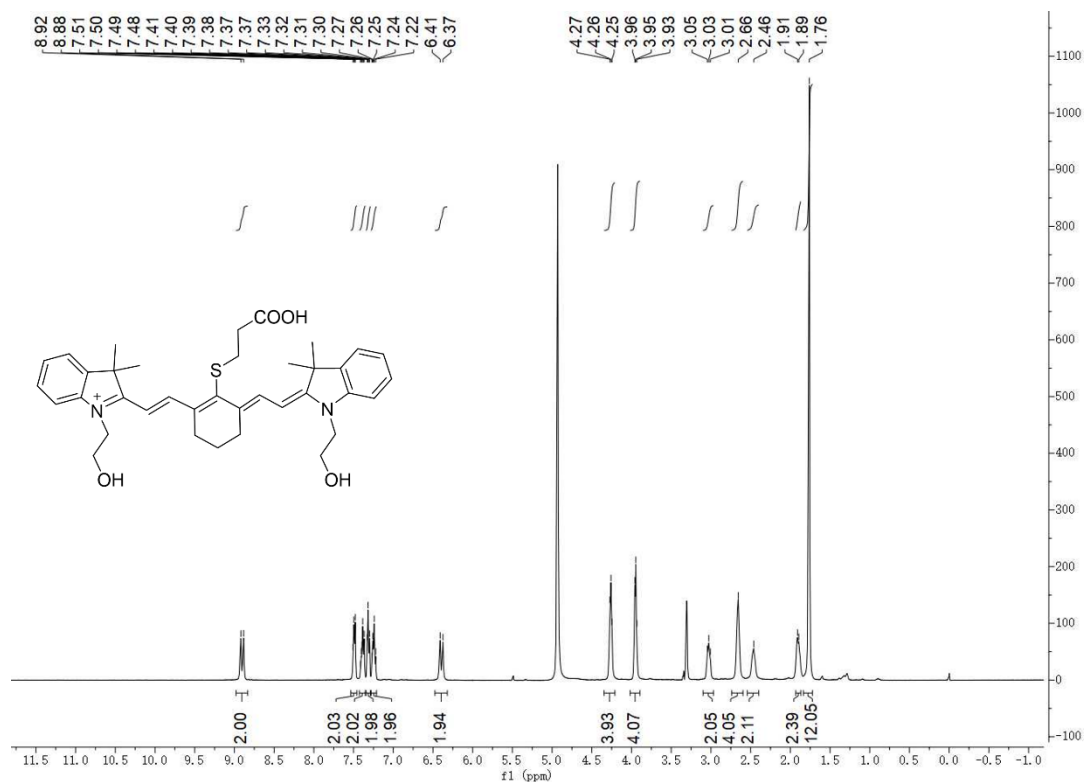

Supplementary figure 6 |  $^1\text{H}$  NMR spectrum of Cy7S in  $\text{CD}_3\text{OD}$ .

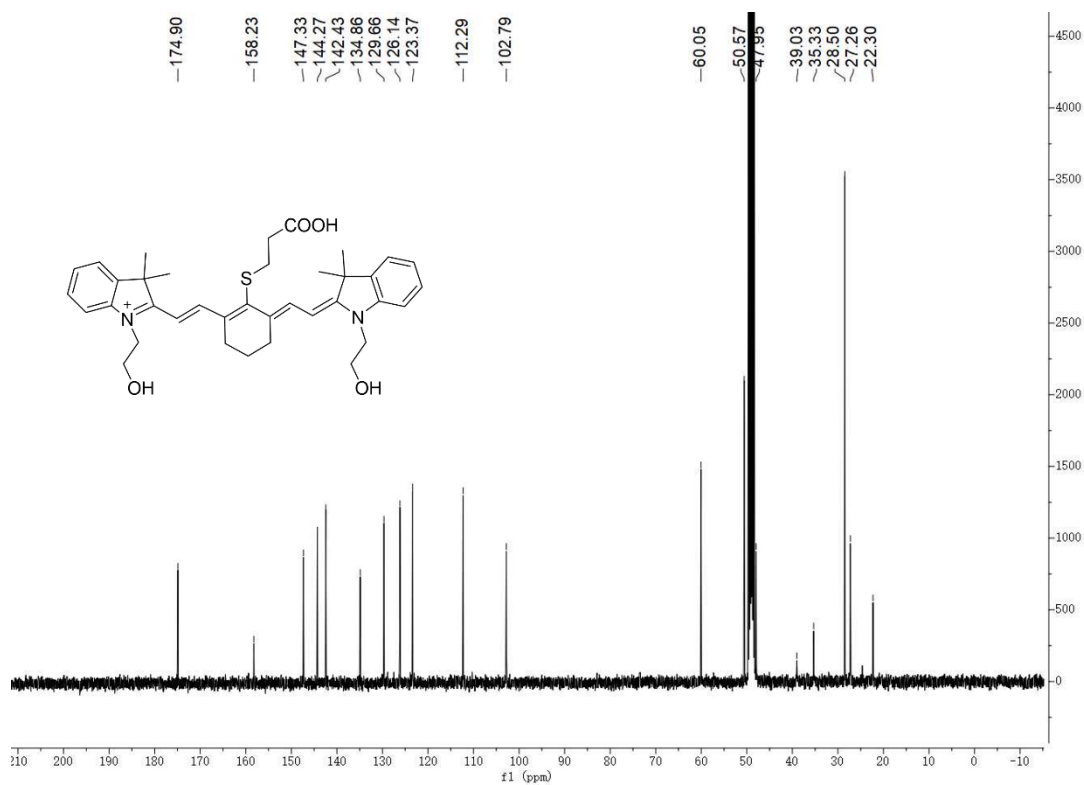

Supplementary figure 7 |  $^{13}\text{C}$  NMR spectrum of Cy7S in  $\text{CD}_3\text{OD}$ .

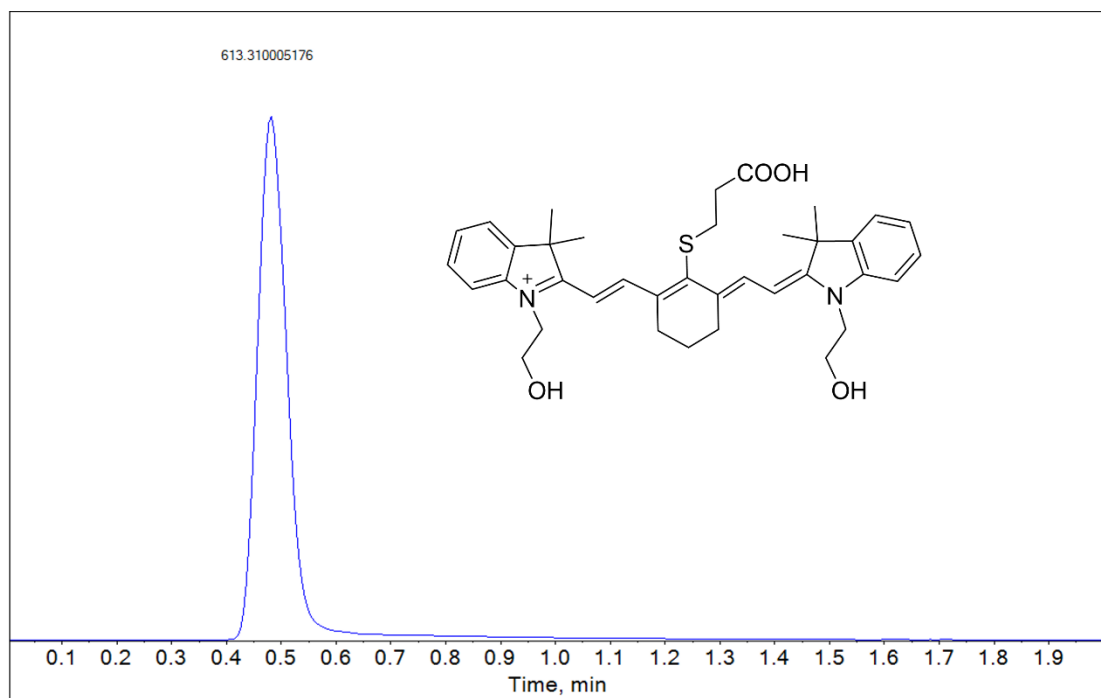

| Compound Name (Library Hit) | Score | Formula                                                         | Intensity | Threshold | Expected m/z | Found at m/z | Error (ppm) | Expected RT (min) | Found RT (min) | RT Delta (min) | Isotope Diff (%) | Library Score (%) |
|-----------------------------|-------|-----------------------------------------------------------------|-----------|-----------|--------------|--------------|-------------|-------------------|----------------|----------------|------------------|-------------------|
| 613.31005176                | 98%   | C <sub>37</sub> H <sub>45</sub> N <sub>2</sub> O <sub>4</sub> S | 588373    | 5         | 613.3095     | 613.3094     | -0.2        | 0.00              | 0.48           | 0.48           | 2.8%             | N/A               |

Supplementary figure 8 | High-resolution mass spectrum of Cy7S.

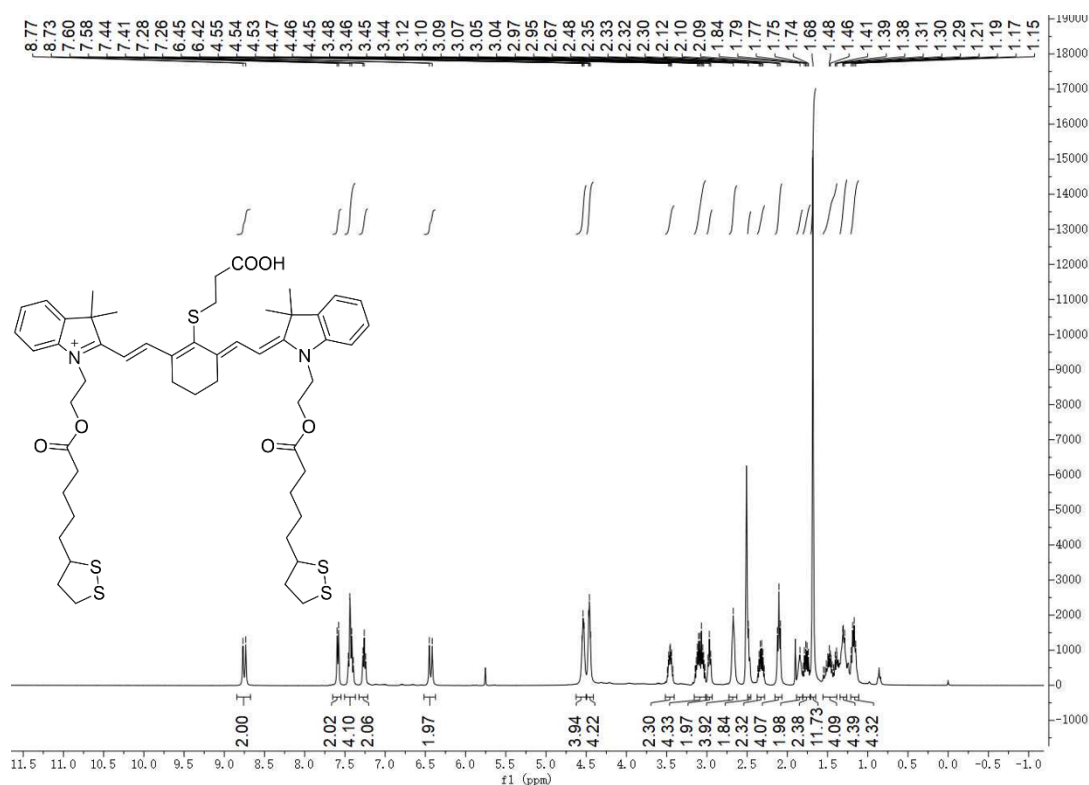

Supplementary figure 9 | <sup>1</sup>H NMR spectrum of Lip-Cy7S in DMSO-d<sub>6</sub>.

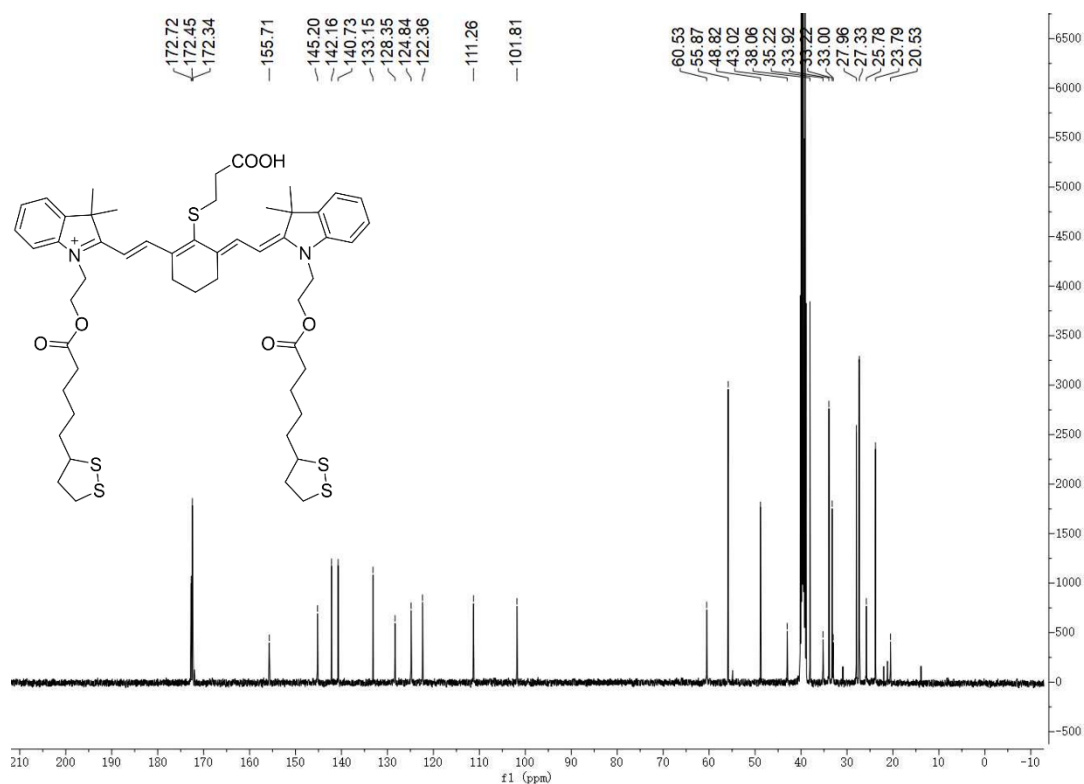

Supplementary figure 10 |  $^{13}\text{C}$  NMR spectrum of Lip-Cy7S in  $\text{DMSO}-d_6$ .

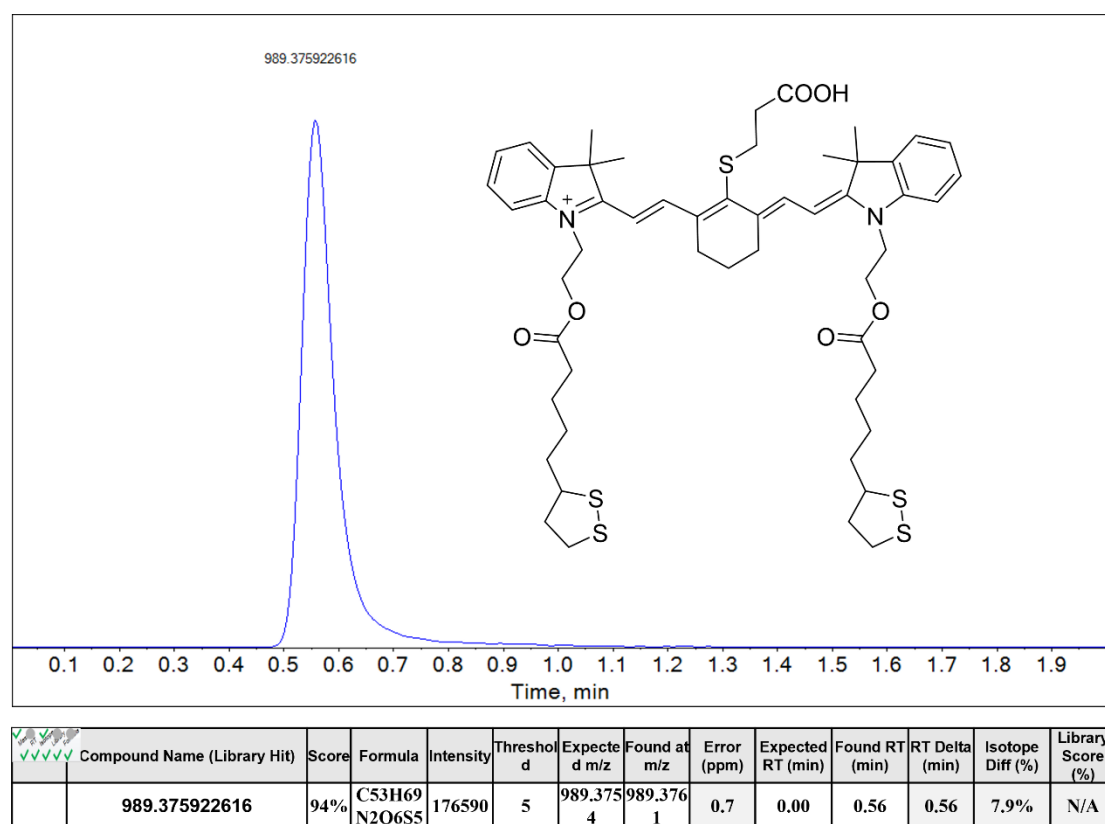

Supplementary figure 11 | High-resolution mass spectrum of Lip-Cy7S.

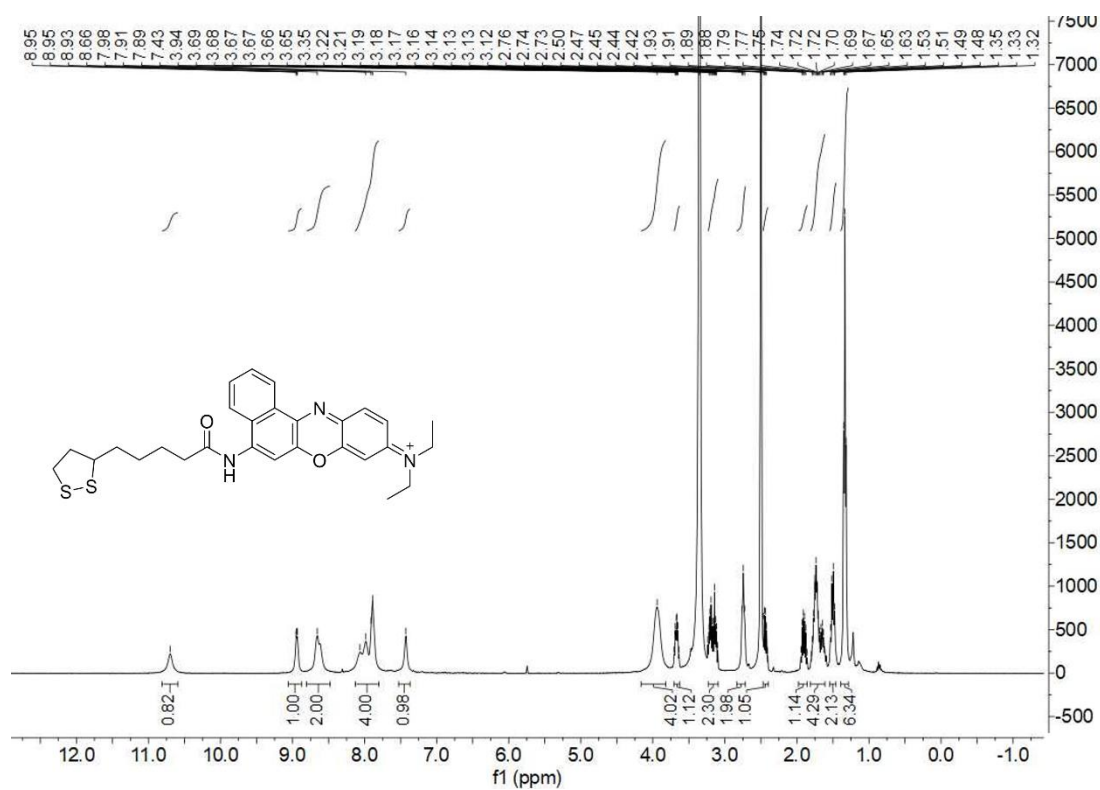

Supplementary figure 12 | <sup>1</sup>H NMR spectrum of Lip-NB in DMSO-d<sub>6</sub>.

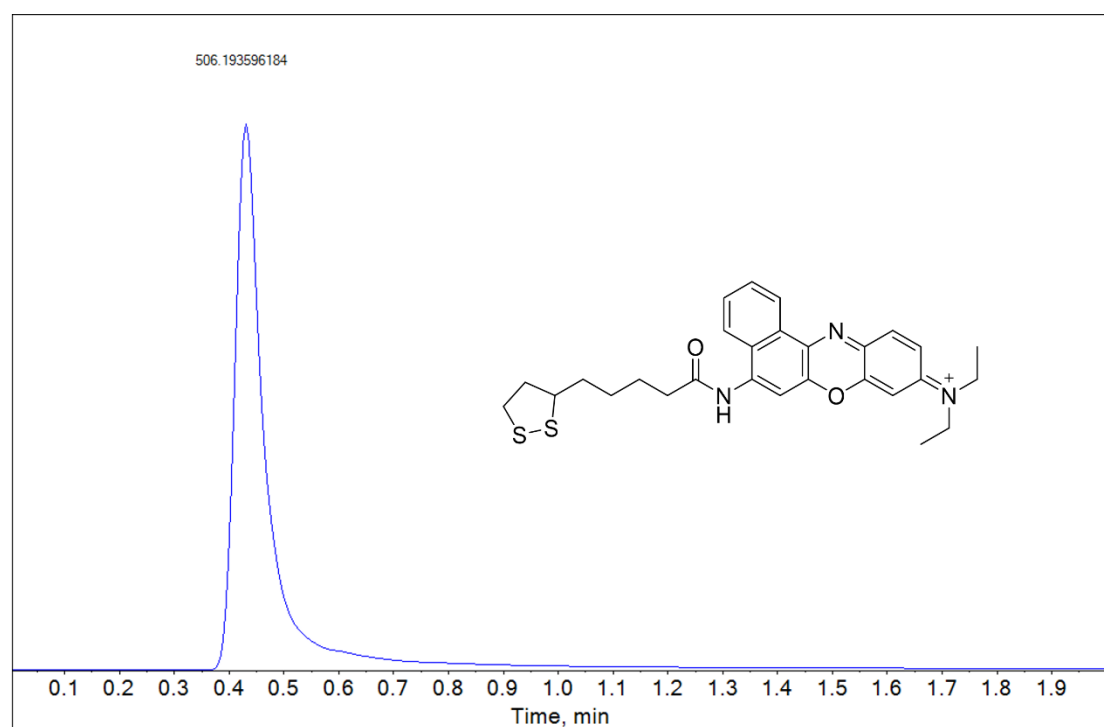

| ✓✓✓✓✓ | Compound Name (Library Hit) | Score | Formula                                                                      | Intensity | Threshold | Expected m/z | Found at m/z | Error (ppm) | Expected RT (min) | Found RT (min) | RT Delta (min) | Isotope Diff (%) | Library Score (%) |
|-------|-----------------------------|-------|------------------------------------------------------------------------------|-----------|-----------|--------------|--------------|-------------|-------------------|----------------|----------------|------------------|-------------------|
|       | 506.193596184               | 95%   | C <sub>28</sub> H <sub>32</sub> N <sub>3</sub> O <sub>2</sub> S <sub>2</sub> | 2970718   | 5         | 506.1930     | 506.1934     | 0.6         | 0.00              | 0.43           | 0.43           | 3.4%             | N/A               |

Supplementary figure 13 | High-resolution mass spectrum of Lip-NB.

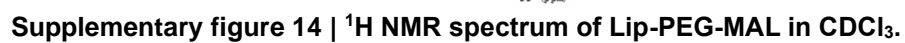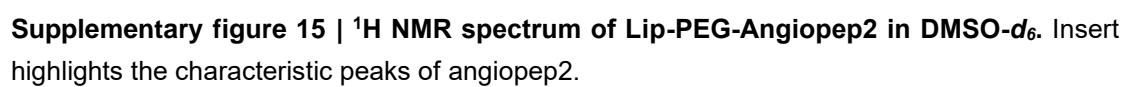

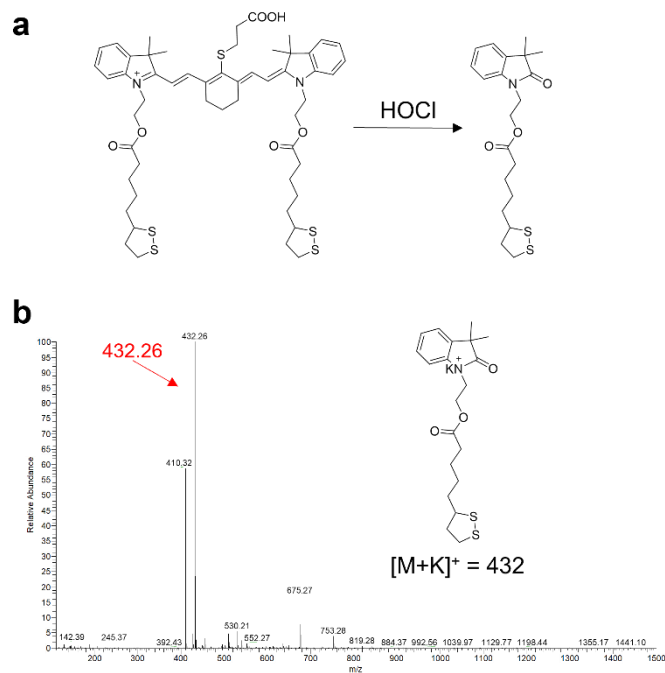

**Supplementary figure 16 | HOCl triggered cleavage of Raman reporter molecule Lip-Cy7S.**  
**a**, The proposed response mechanism of Lip-Cy7S inferred from the structural degradation. **b**, HPLC-MS spectrum of the reaction mixture. Upon treatment with HOCl, a new mass peak appeared at  $m/z$  432.26  $[M+K]^+$ , indicating the cleavage of the polymethine chain of Lip-Cy7S.

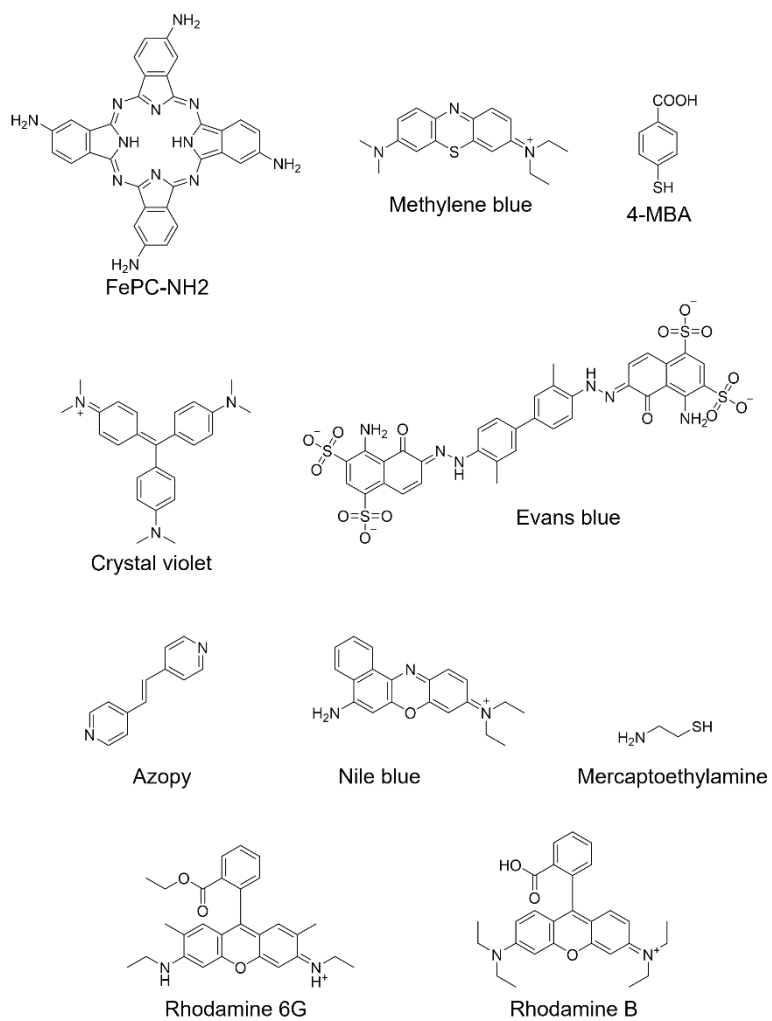

**Supplementary figure 17 | Chemical structures of the molecules screened as a reference Raman reporter in this study.**

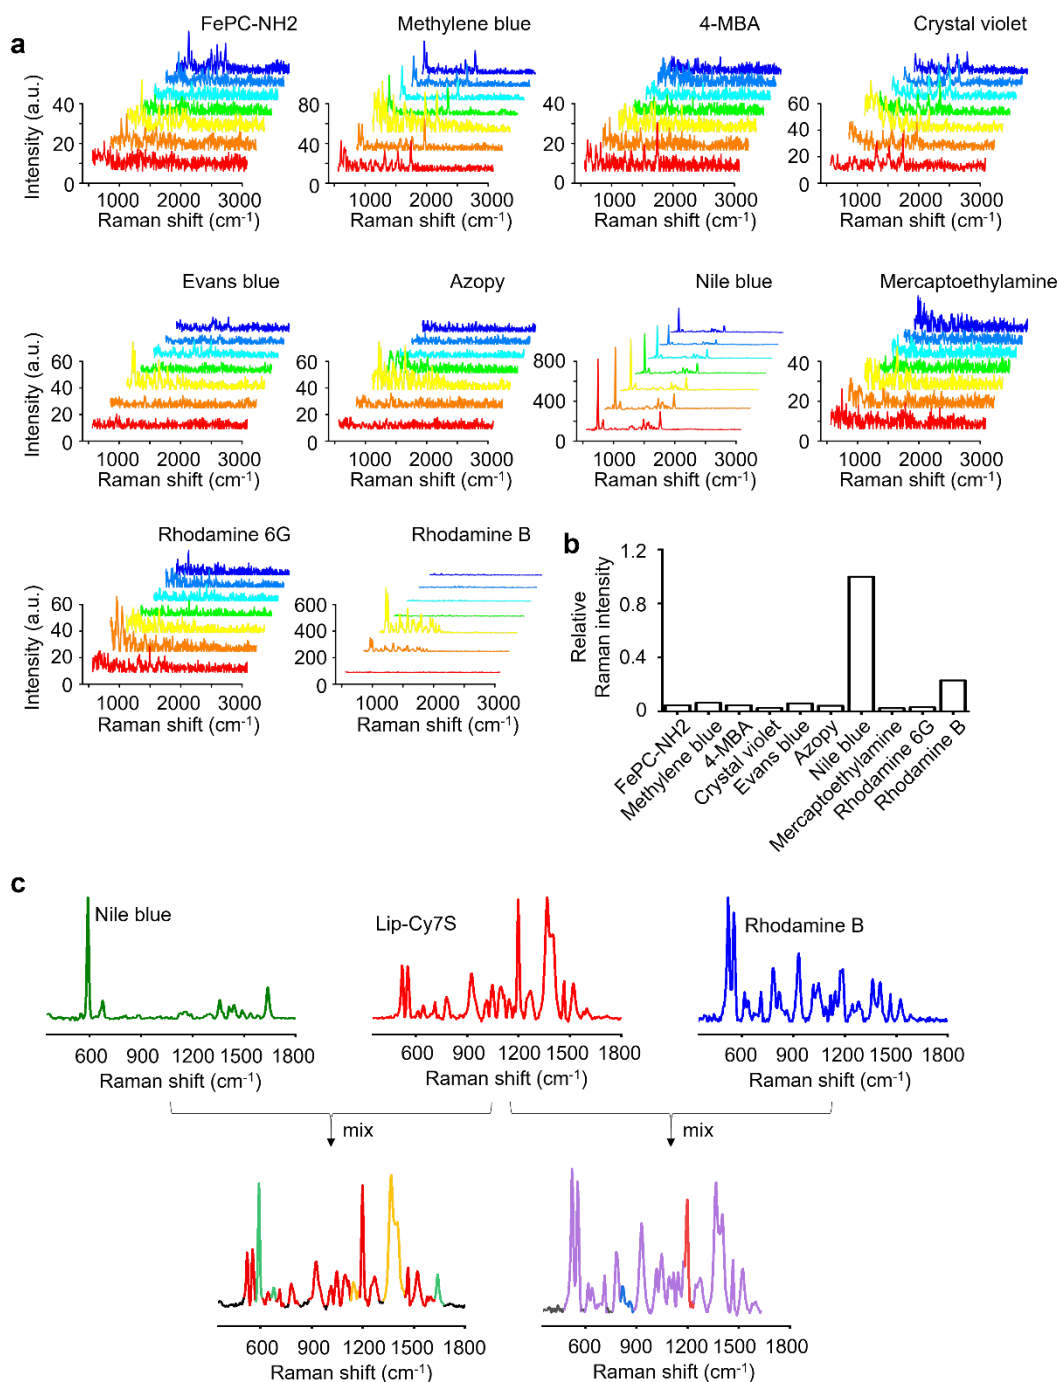

**Supplementary figure 18 | Screening Raman reporter molecules as a built-in inner reference.** **a**, Raman spectra of the screened molecules with various concentrations. **b**, Statistical analysis of SERS intensity shows the Au star with Nile blue and Rhodamine B generated higher Raman signals than other Reporters. **c**, Screening of Raman reporter molecules with non-overlapping peaks with Lip-Cy7S. The Raman spectrum of Lip-Cy7S, Nile blue and Rhodamine B were shown in red, green and blue, respectively (Upper). Mixed Raman spectrum of reporter Nile blue and reporter Rhodamine B with Lip-Cy7S, respectively (Bottom). The overlapping Raman peaks of Lip-Cy7S with reporter Nile blue were shown in yellow. The overlapping Raman peaks of Lip-Cy7S with Reporter Rhodamine B were shown in purple. Reporter Nile blue exhibits a non-overlapping Raman spectrum with Lip-Cy7S.



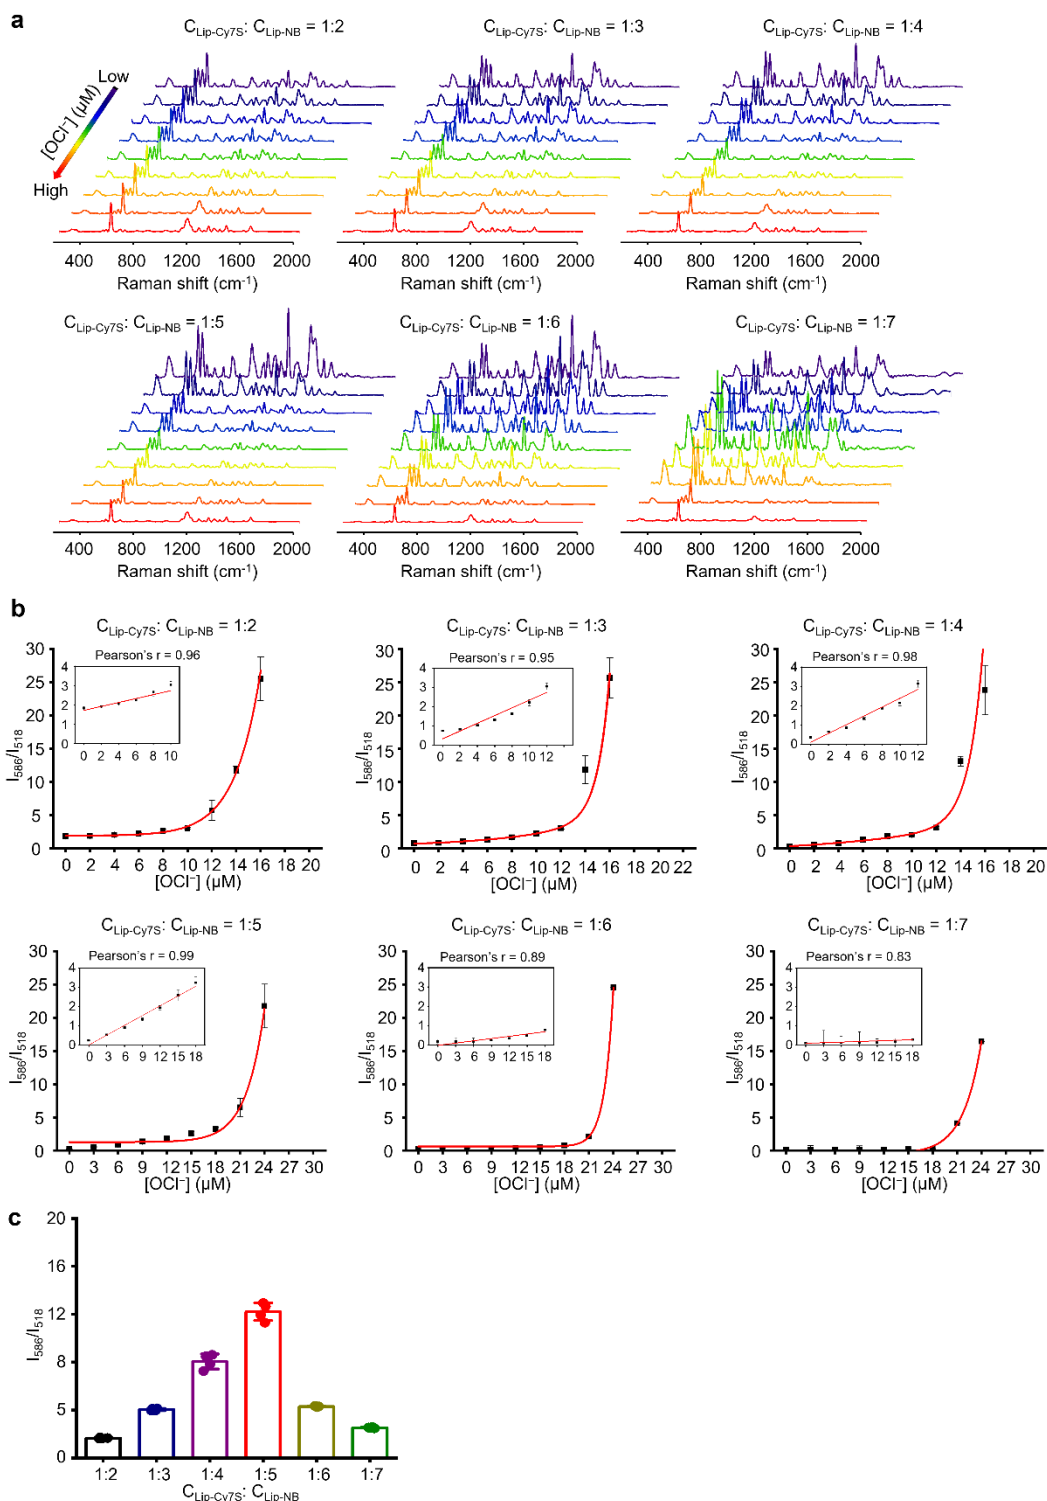

**Supplementary figure 19 | The ratio between Lip-Cy7S and Lip-NB plays an important role in the performance for sensing HOCl. a,** Raman spectrum of various Raman reporter ratios (Lip-Cy7S/Lip-NB = 2, 3, 4, 5, 6, 7) after the addition of OCI<sup>-</sup> at various concentrations. **b,** Plots of Raman intensity ratios ( $I_{586}/I_{518}$ ) versus concentrations of OCI<sup>-</sup> with various Raman reporter ratios. Inset shows the linear response to lower OCI<sup>-</sup> concentrations. **c,** Quantification of linear range for sensing OCI<sup>-</sup> with various Raman reporter ratios. Data are presented as the mean  $\pm$  s.d. ( $n = 3$ ).

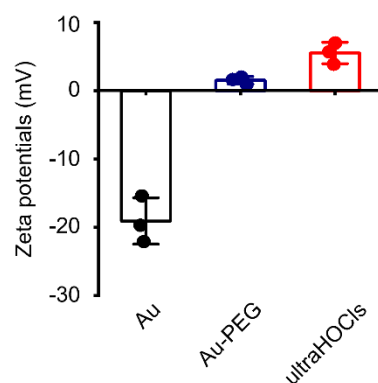

**Supplementary figure 20 | The surface charges of each nanoformulation.** The zeta potential of naked gold nanostar, gold nanostar modified with PEG and the HOCl ratiometric SERS nanosensor ultraHOCIs. Au, gold nanostar.

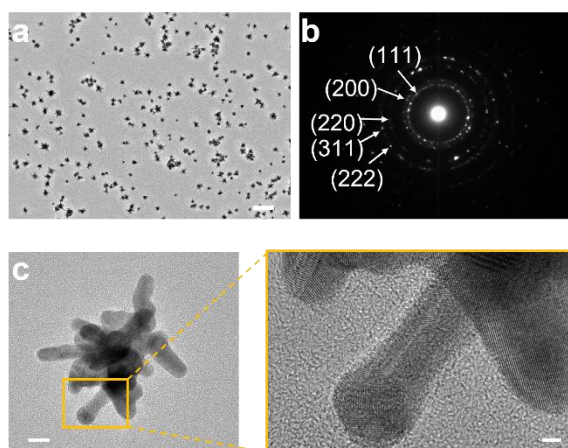

**Supplementary figure 21 | Characterization of ultraHOCIs.** **a**, TEM images of the as-prepared ultraHOCIs. Scale bar, 200 nm. **b**, SAED patterns of the ultraHOCIs show the (111), (200), (220), (311), and (222) reflections of gold. **c**, High-resolution TEM images of ultraHOCIs. Scale bar for left, 10 nm; Scale bar for right, 2 nm.

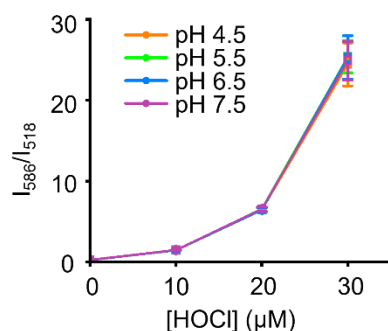

**Supplementary figure 22 | Sensitivity of ultraHOCl<sub>s</sub> to HOCl is pH-independent.** Normalized  $I_{586}/I_{518}$  values of ultraHOCl<sub>s</sub> at pH 4.5, 5.5, 6.5 and 7.5 against different concentrations of HOCl (from 0 to 30  $\mu\text{M}$ ). Data are presented as the mean  $\pm$  s.d. ( $n = 4$ ).

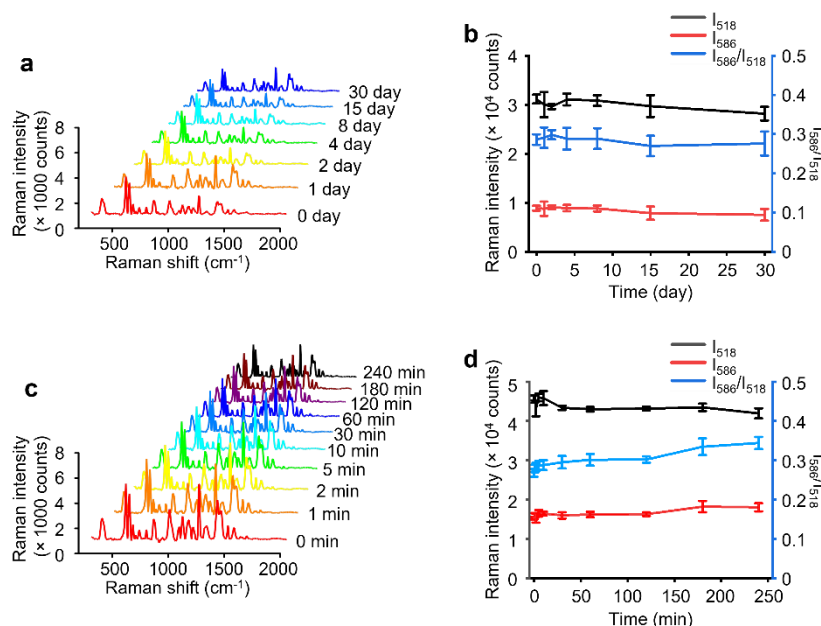

**Supplementary figure 23 | UltraHOCl<sub>s</sub> shows long shelf life and high photostability.** **a**, Raman spectra showing uncompromised storage stability of 1 nM ultraHOCl<sub>s</sub> at 4  $^{\circ}\text{C}$  in one month. Spectra were acquired at selected time points. **b**, The intensity of 518  $\text{cm}^{-1}$  peak, 586  $\text{cm}^{-1}$  peak and the SERS intensity ratio ( $I_{586}/I_{518}$ ) were plotted against incubation time showing excellent storage stability of ultraHOCl<sub>s</sub>. **c**, Raman spectra showing photostability of 1 nM ultraHOCl<sub>s</sub> during continuous irradiation (80 mW laser power) for 240 min. Spectra were acquired at selected time points. **d**, The intensity of 518  $\text{cm}^{-1}$  peak, 586  $\text{cm}^{-1}$  peak and the SERS intensity ratio ( $I_{586}/I_{518}$ ) were plotted against irradiation time showing a high photostability of the ultraHOCl<sub>s</sub>. Data are presented as the mean  $\pm$  s.d. ( $n = 4$ ).

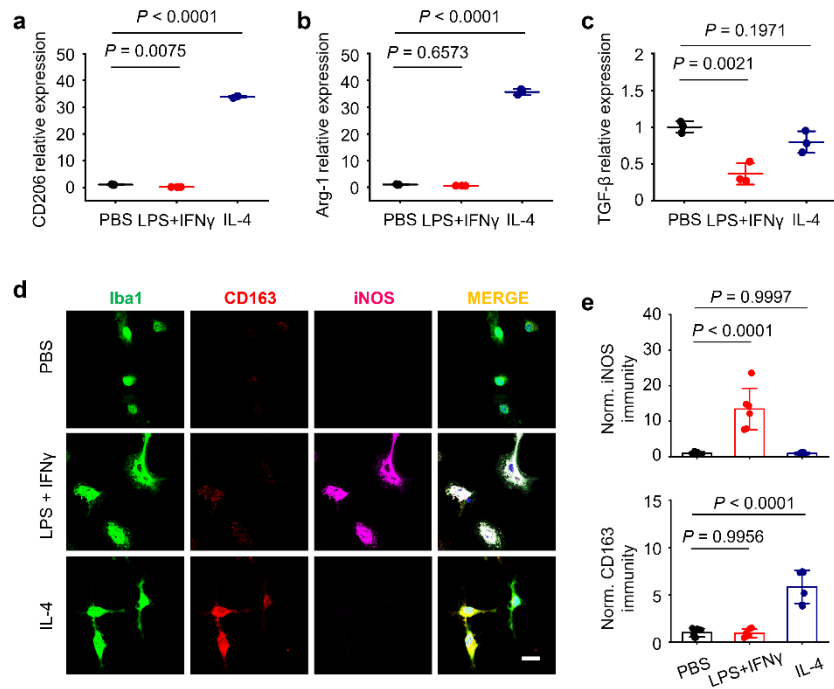

**Supplementary figure 24 | Establishment of mouse primary microglia with different phenotypes.** **a–c**, Relative mRNA expression of CD206 (**a**), Arg-1 (**b**) and TGF- $\beta$  (**c**) in primary mouse microglia after treatment with LPS+IFN $\gamma$ , IL-4 or isovolumetric PBS. **d**, Co-immunostaining for Iba1, iNOS, CD163, and DAPI counterstain in the primary cultures of mouse microglia after various treatments. Scale bar, 20  $\mu$ m. **e**, Quantification of iNOS and CD163 staining in Iba1-positive microglia by ImageJ. All values are presented as the mean  $\pm$  s.d of biologically independent samples with  $n = 3$  (**a–c**) and  $n = 6$  (**d,e**).  $P$  values were analysed by one-way ANOVA with Tukey's post-hoc test.

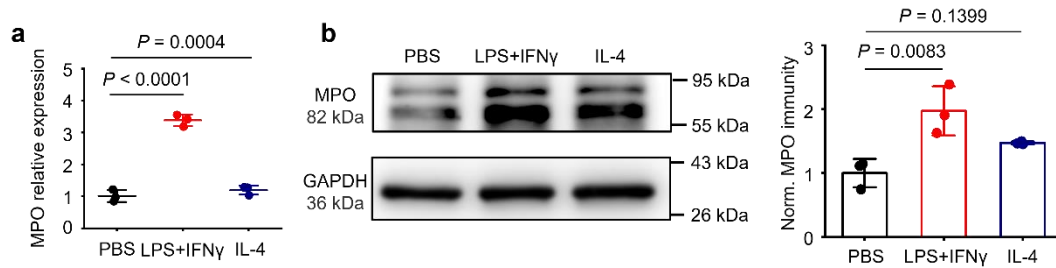

**Supplementary figure 25 | Upregulation of MPO is found in proinflammatory microglia.**

**a**, Relative mRNA expression of MPO in primary mouse microglia after treatment with LPS+IFN $\gamma$ , IL-4 or isovolumetric PBS. **b**, Immunoblots and quantification of the MPO in primary mouse microglia after treatment with LPS+IFN $\gamma$ , IL-4 or isovolumetric PBS. Data are presented as the mean  $\pm$  s.d. ( $n = 3$  biologically independent experiments).  $P$  values were analysed by one-way ANOVA with Tukey's post-hoc test.

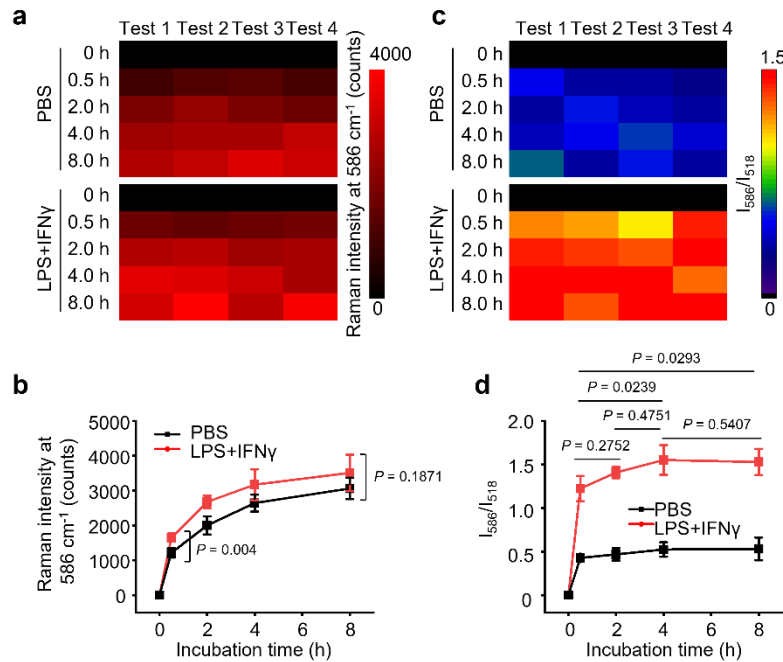

**Supplementary figure 26 | Dynamic cellular uptakes of ultraHOCIs in primary mouse microglia.**

**a,b**, Heat map (**a**) and quantification (**b**) of SERS intensities collected at 586 cm $^{-1}$  of PBS-treated and LPS-treated microglia after incubating with ultraHOCIs for different times. **c,d**, Heat map (**c**) and quantification (**d**) of SERS intensity ratios ( $I_{586}/I_{518}$ ) of PBS-treated and LPS-treated microglia after incubating with ultraHOCIs for different times. Data are presented as the mean  $\pm$  s.d. ( $n = 4$ ).  $P$  values were analysed by two-tailed unpaired Student's  $t$ -tests (**b**) or one-way ANOVA with Tukey's post-hoc test (**d**).

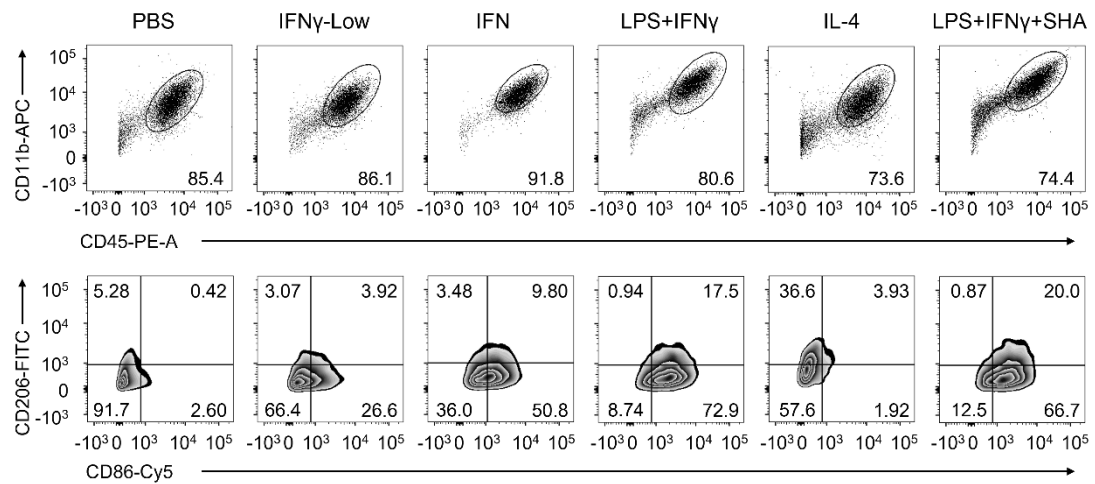

**Supplementary figure 27 | Flow cytometry analysis of phenotypic polarization of the cultured primary mouse microglia after various treatments.** The primary mouse microglia were stimulated with the following treatments. IFN $\gamma$ -Low: 40 ng/mL IFN $\gamma$ ; IFN $\gamma$ : 100 ng/mL IFN $\gamma$ ; LPS+IFN $\gamma$ : 600 ng/mL LPS plus 100 ng/mL IFN $\gamma$ ; IL-4: 40 ng/mL IL-4; LPS+IFN $\gamma$ +SHA: 600 ng/mL LPS plus 100 ng/mL IFN $\gamma$  followed with SHA (500  $\mu$ M).

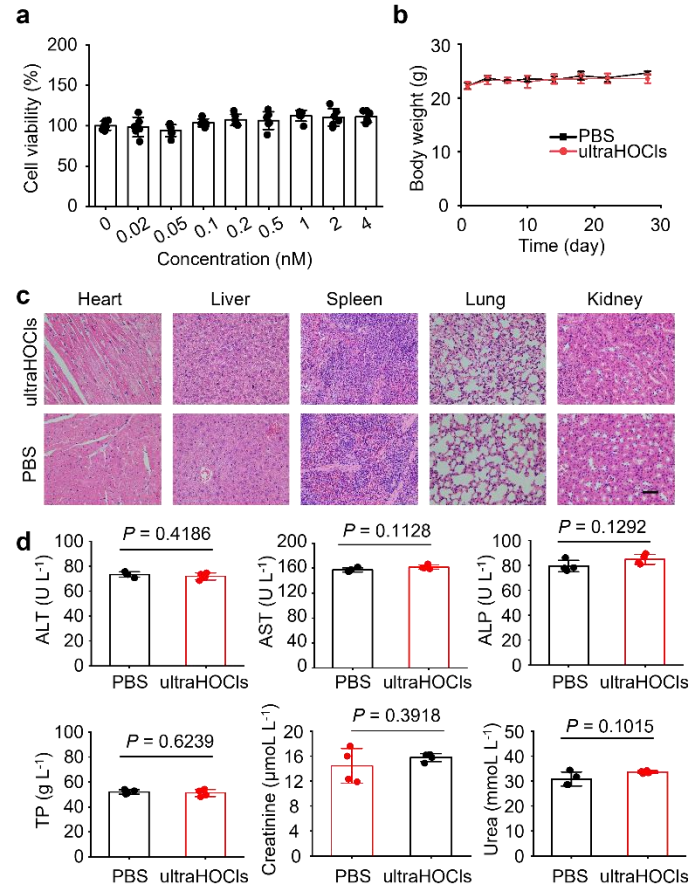

**Supplementary figure 28 | Biosafety evaluation of ultraHOCIs.** **a**, Viabilities of primary mouse microglia after treatment with various concentrations (from 0 to 4 nM) of ultraHOCIs for 24 h. Cell viabilities were determined by the CCK-8 assay. Data are presented as the mean  $\pm$  s.d. ( $n = 6$  biologically independent experiments). **b**, Changes in the body weights of the mice after intravenous injection of ultraHOCIs (800 nmol/kg). The mice treated with isovolumetric PBS were used as controls ( $n = 4$  mice per group). **c**, Representative H&E images of tissues (heart, liver, spleen, lung and kidney) that were harvested from mice 10 days after different treatments. Scale bar, 50  $\mu$ m. **d**, Hepatic function markers (AST, ALP, ALT, serum TP) and renal function markers (creatinine, urea) were tested, and found to be normal compared with the PBS-treated group after 28 days, indicating no noticeable hepatic and renal dysfunctions induced by the ultraHOCIs. Data are presented as the mean  $\pm$  s.d. ( $n = 4$  mice per group).  $P$  values were analysed by two-tailed unpaired Student's  $t$ -tests. AST, aspartate aminotransferase; ALP, alkaline phosphatase; ALT, alanine aminotransferases; TP, total protein.

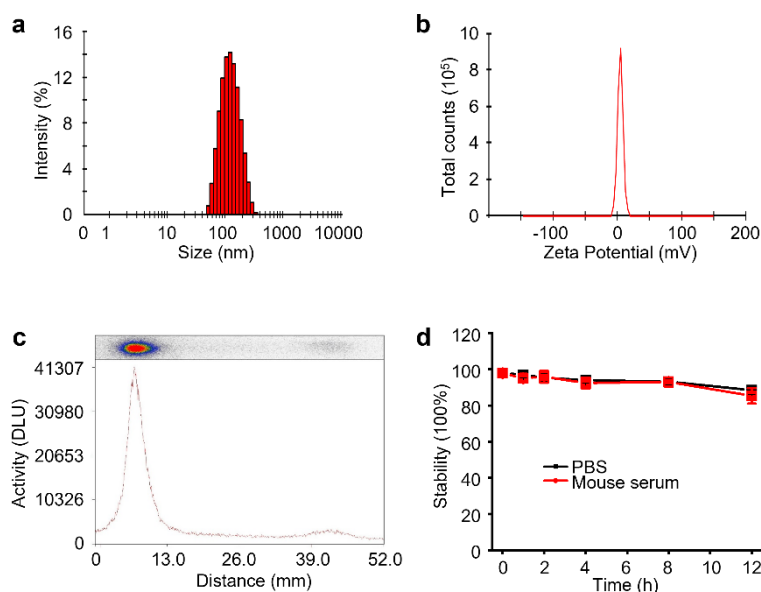

**Supplementary figure 29 | Synthesis and characterization of  $^{99m}\text{Tc}$ -ultraHOCIs.** a,b, Dynamic light scattering (a) and zeta potential analyses (b) showed that  $^{99m}\text{Tc}$ -ultraHOCIs had similar hydrodynamic diameter and surface potential to ultraHOCIs. c, The radiochemical purity of  $^{99m}\text{Tc}$ -ultraHOCIs was greater than 97% as measured by paper chromatography with normal saline as the mobile phase. d, Radiostability of  $^{99m}\text{Tc}$ -ultraHOCIs in PBS (pH 7.4) and mouse serum. Data are presented as the mean  $\pm$  s.d. (n = 3).

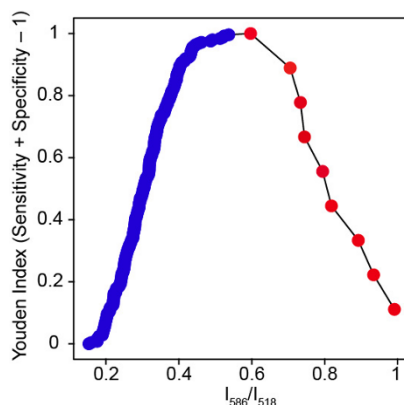

**Supplementary figure 30 | Youden's-Index performance for different cut-off values of  $I_{586}/I_{518}$ .** The best cut-off point of  $I_{586}/I_{518}$  is 0.6.



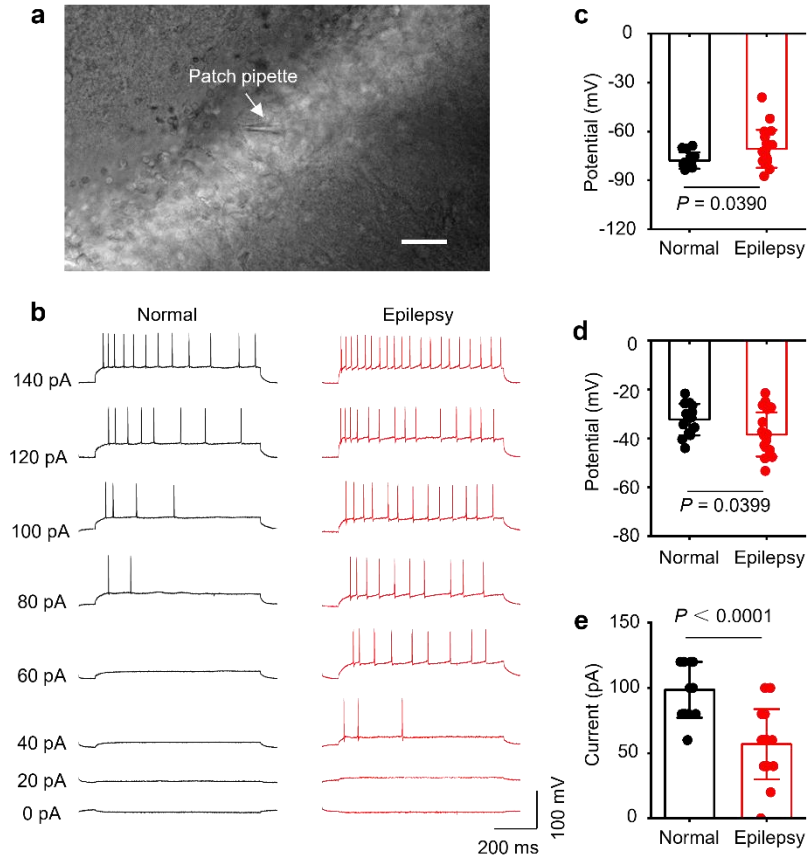

**Supplementary figure 31 | Increased excitability of neurons is recorded from resected mouse brain tissues with high  $I_{586}/I_{518}$  ratios.** **a**, A bright-field image of a patch pipette attached to the membrane of a hippocampal neuron in resected mouse brain slices derived from a KA model. **b**, Action potential (AP) trains induced by injecting increased currents (0-pA–140-pA with an increment of 20 pA). **c–e**, Statistical analysis of resting membrane potential (**c**), AP threshold (**d**) and rheobase (**e**) recorded from mouse brain slices ( $n = 14$  for normal,  $n = 19$  for epilepsy). Data are presented as the mean  $\pm$  s.d.  $P$  values were calculated using unpaired two-tailed Student's  $t$ -tests.

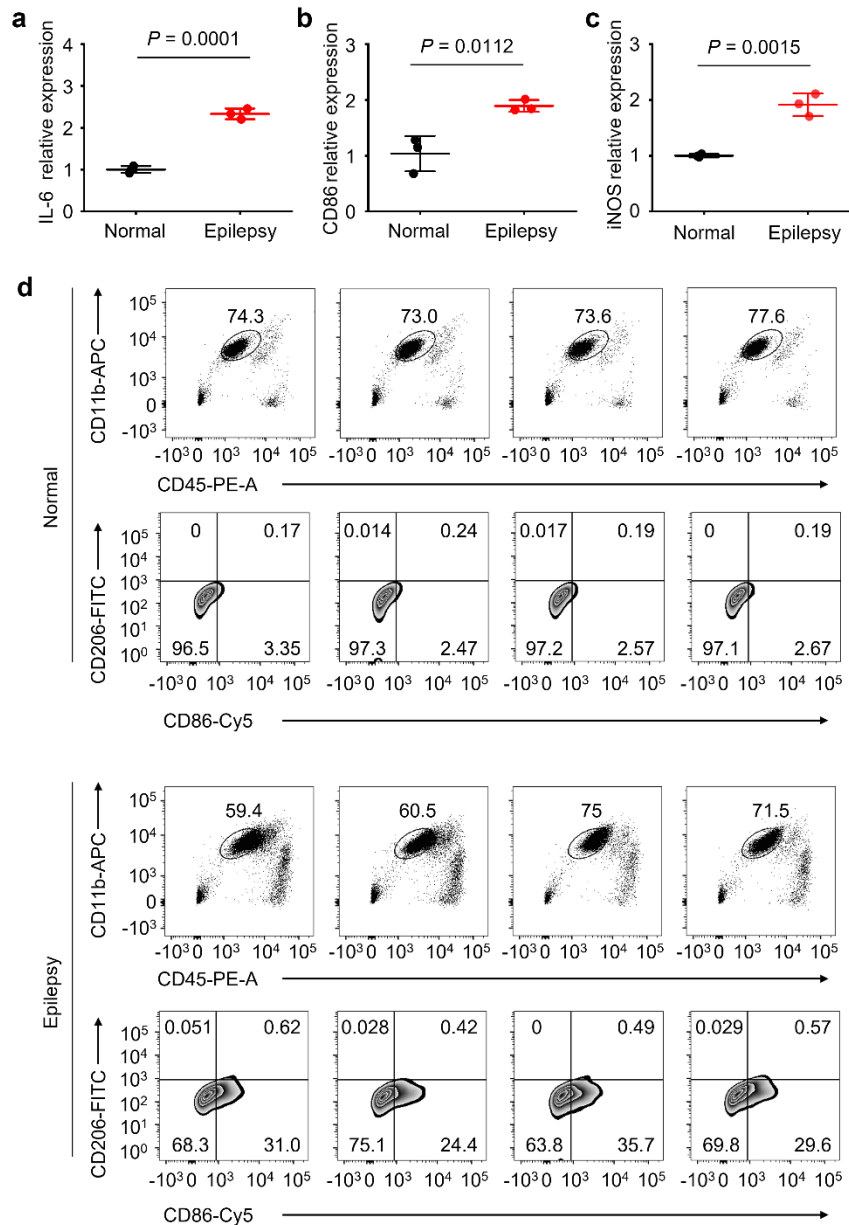

**Supplementary figure 32 | Proinflammatory microglia are evident in epileptic foci (EF) of KA models.** **a-c**, Relative mRNA expression of IL-6 (**a**), CD86 (**b**), iNOS (**c**) in resected mouse brain tissues from KA models. **d**, Flow cytometry results of phenotypic polarization of the microglia in resected mouse brain tissues from KA models. All values are presented as the mean  $\pm$  s.d of biologically independent samples with  $n = 3$  (**a-c**) and  $n = 4$  (**d**).  $P$  values were calculated using unpaired two-tailed Student's  $t$ -tests.

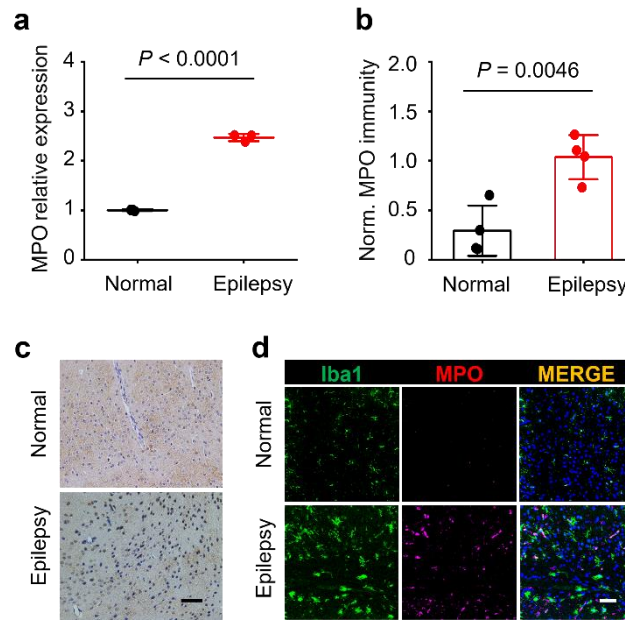

**Supplementary figure 33 | Upregulation of MPO is found in the resected mouse brain tissues with higher  $I_{586}/I_{518}$  ratios.** **a**, Relative mRNA expression of MPO in resected mouse brain tissues from KA models. **b**, Quantification of the immunoblots results of MPO expression in KA models. **c**, Representative immunohistochemistry of MPO in KA models. Upregulation of MPO was found in epileptic tissues. Scale bar, 50  $\mu$ m. **d**, Co-localization and quantification of MPO with Iba1 in KA models. Scale bar, 50  $\mu$ m. All values are presented as the mean  $\pm$  s.d of biologically independent samples with  $n = 3$  (**a**) and  $n = 4$  (**b**).  $P$  values were calculated using unpaired two-tailed Student's  $t$ -tests.

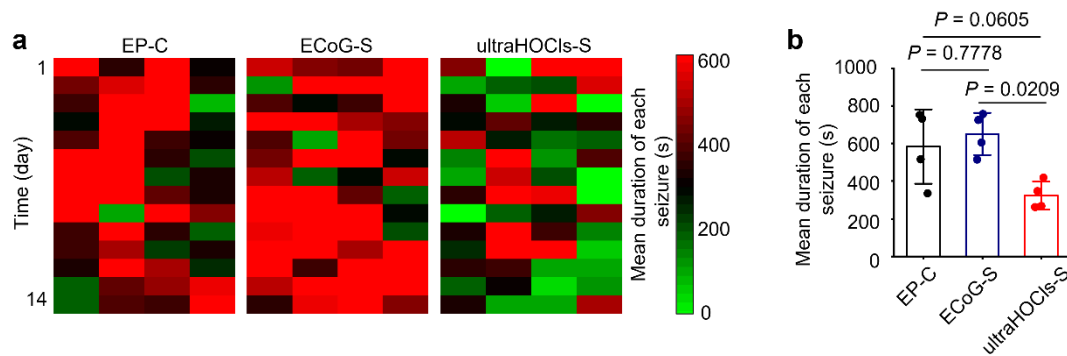

**Supplementary figure 34 | UltraHOCIs-guided surgery alleviates neuronal seizure activity in KA-induced mouse model.** **a,b**, Heat map (**a**) and quantification (**b**) of mean duration of paroxysmal discharges over time (per 8 h) per mouse in the EP-C, ECoG-S, and ultraHOCIs-S groups ( $n = 4$  mice per group). Data are presented as the mean  $\pm$  s.d.  $P$  values were analysed by one-way ANOVA with Tukey's post-hoc test.

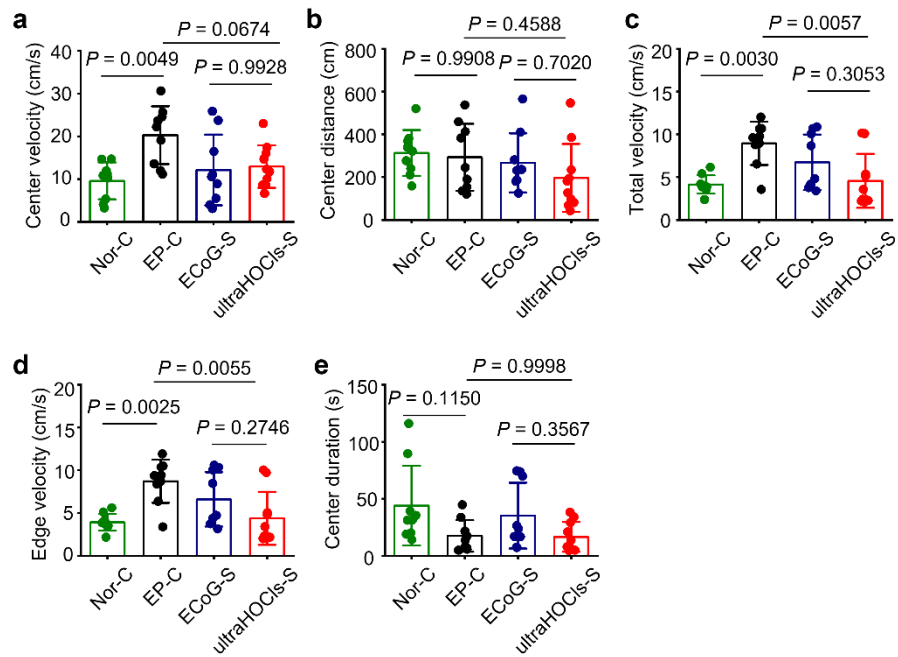

**Supplementary figure 35 | Decreased hyperactivity but no obvious reductions in anxiety-like behavior in the open field test in the ultraHOCls-S group. a–e**, The center velocity (a), distance traveled in the center (b), total velocity (c), velocity in the edge (d) and duration in the center (e) of the open field over the 10-min test period ( $n = 9$  mice per group for the Nor-C, EP-C, ECoG-S groups,  $n = 10$  mice for the ultraHOCls-S group). Data are presented as the mean  $\pm$  s.d.  $P$  values were analysed by one-way ANOVA with Tukey's post-hoc test.

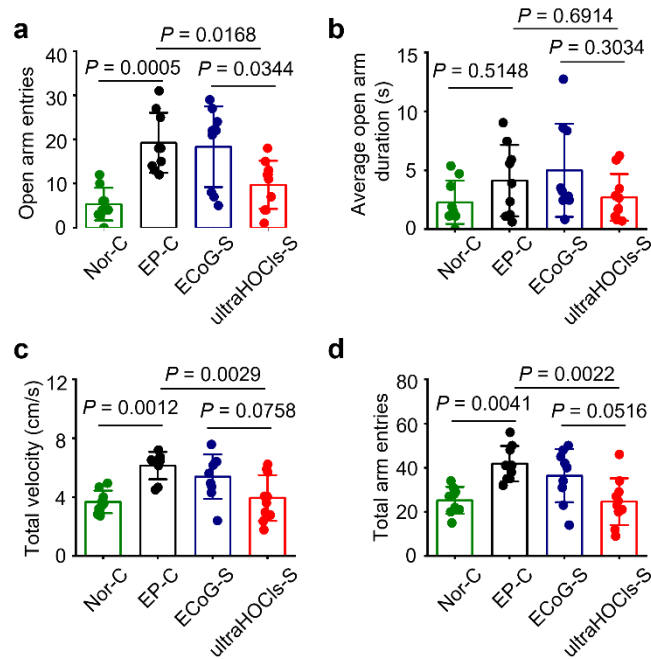

**Supplementary figure 36 | Decreased hyperactivity but no obvious reductions in anxiety-like behavior in the elevated plus-maze test in the ultraHOCls-S group.** a-d, The entries in the open arms (a), the average duration in the open arms (b), total velocity (c), and the number of total arm entries (d) over the 5-min test period (n = 9 mice per group for the Nor-C, EP-C, ECoG-S groups, n = 10 mice for the ultraHOCls-S group). Data are presented as the mean  $\pm$  s.d. *P* values were analysed by one-way ANOVA with Tukey's post-hoc test.

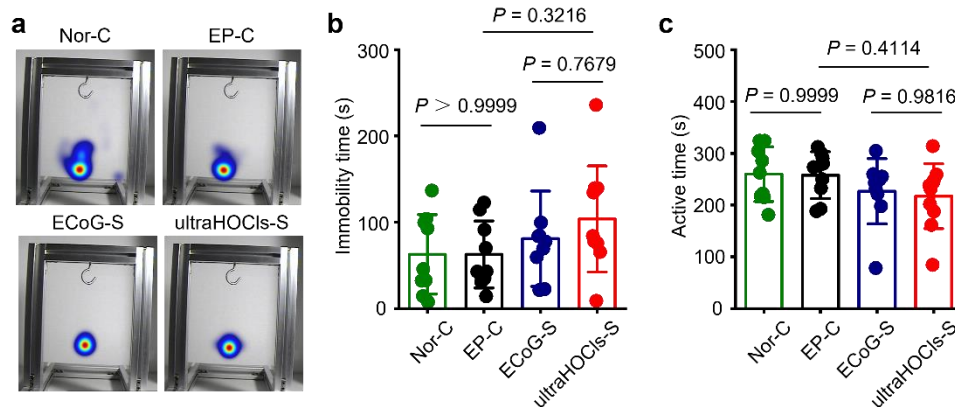

**Supplementary figure 37 | No obvious depression-related behavior alteration is observed in the tail suspension test in the ultraHOCls-S group.** a, Representative heatmaps show traveling trace. b,c, Immobility time (b) and active time (c) in the tail suspension test (n = 9 mice per group for the Nor-C, EP-C, ECoG-S groups, n = 10 mice for the ultraHOCls-S group). Data are presented as the mean  $\pm$  s.d. *P* values were analysed by one-way ANOVA with Tukey's post-hoc test.

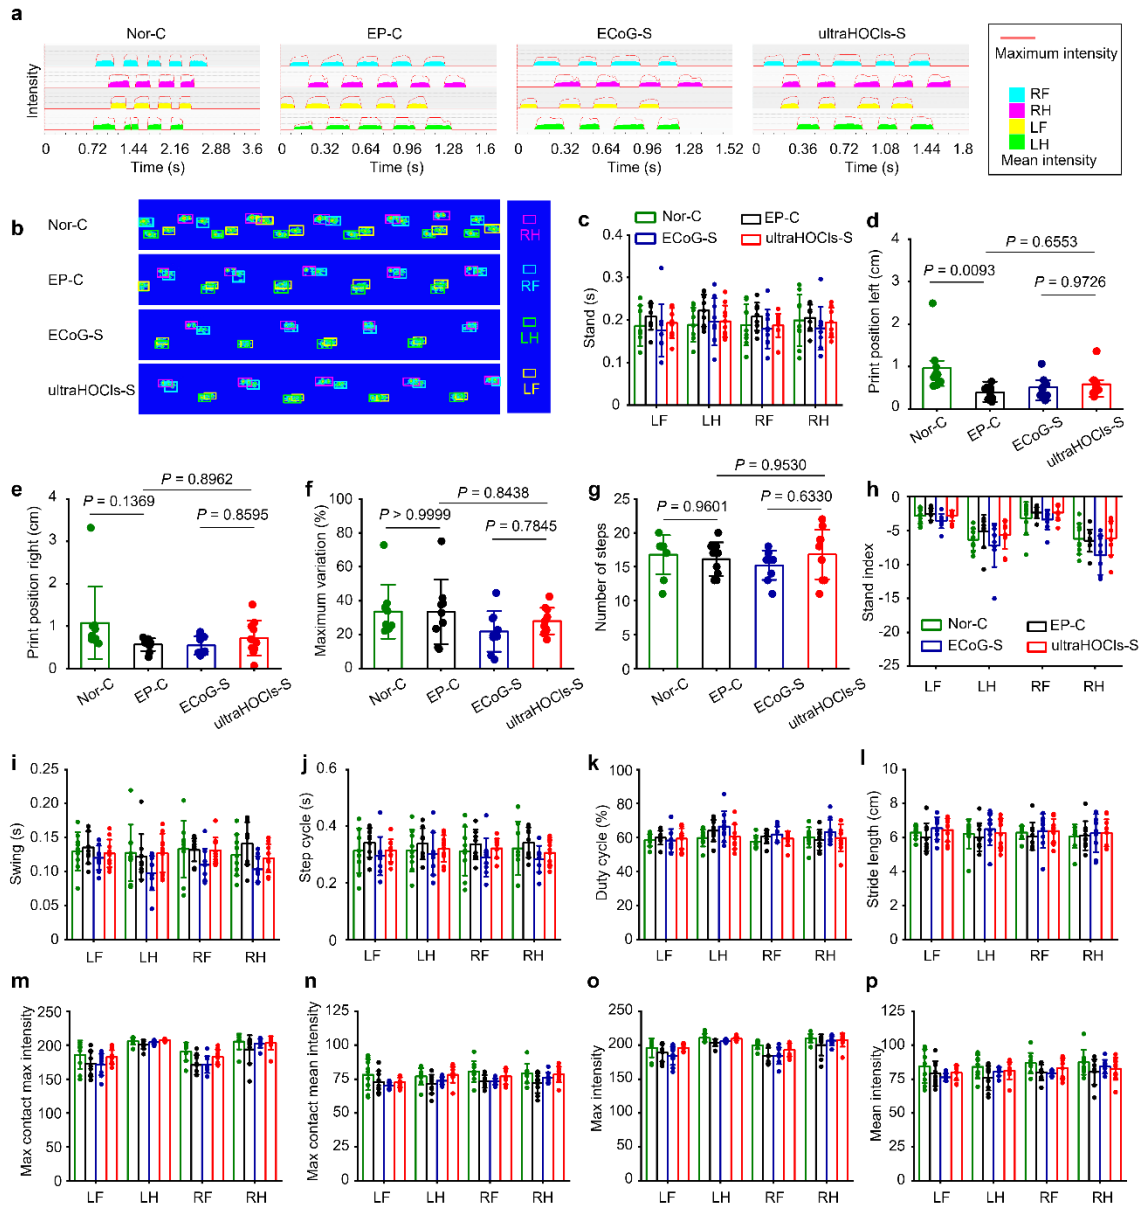

**Supplementary figure 38 | No deficits in motor function and coordination were observed in the Catwalk gait analysis in the ultraHOCIs-S group.** **a**, 2D footprint intensity images of the legs in the various experimental groups. The time course of the weight load was measured as mean intensity. **b**, Representative gait images in the Catwalk gait analysis. **c-p**, Quantification of dynamic paw parameters included stand (**c**), the print position of left (**d**), the print position of right (**e**), the percentage of maximum variation (**f**), number of steps (**g**), stand index of four paws (**h**), swing of four paws (**i**), step cycle of four paws (**j**), the percentage of duty cycle of four paws (**k**), stride length of four paws (**l**), max contact max intensity (**m**), max contact mean intensity (**n**), max intensity (**o**), and mean intensity (**p**). RF, right front paw; RH, right hind paw; LF, left front paw; LH, left hind paw ( $n = 9$  mice per group for the Nor-C, EP-C, ECoG-S groups,  $n = 10$  mice for the ultraHOCIs-S group). Data are presented as the mean  $\pm$  s.d.  $P$  values were analysed by one-way ANOVA with Tukey's post-hoc test.

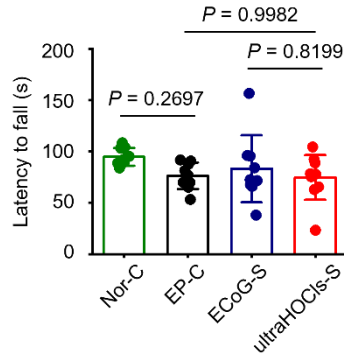

**Supplementary figure 39 | No deficits in motor coordination are observed in the accelerating rotarod test in the ultraHOCIs-S group.** The time of latency to fall in the accelerating rotarod test ( $n = 9$  mice per group for the Nor-C, EP-C, ECoG-S groups,  $n = 10$  mice for the ultraHOCIs-S group). Data are presented as the mean  $\pm$  s.d.  $P$  values were analysed by one-way ANOVA with Tukey's post-hoc test.

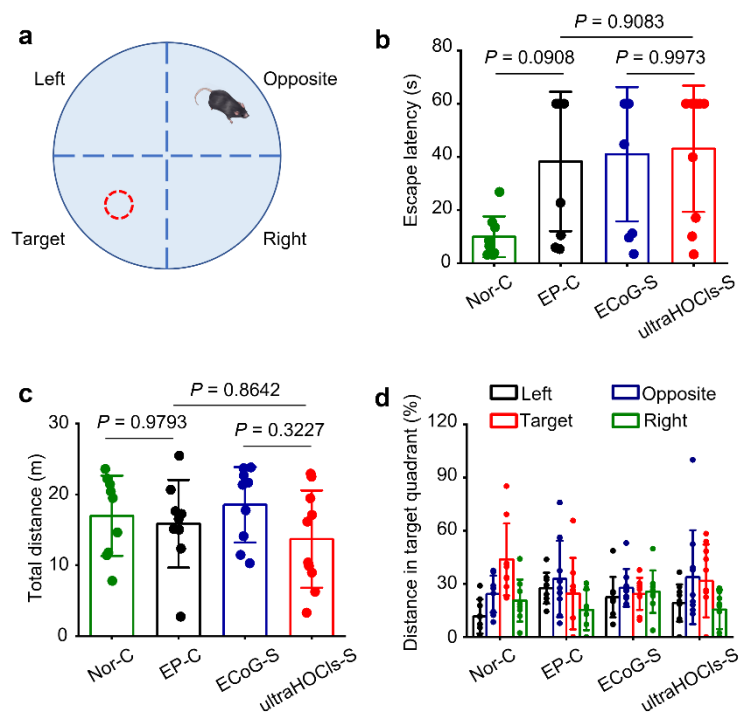

**Supplementary figure 40 | UltraHOCIs-guided surgery does not aggravate the spatial memory damage.** **a**, Scheme of the Morris water maze. **b,c**, Mean latency of escape (**b**) and total distance (**c**) from the Morris Water Maze test. **d**, The percentage of distance traveled in four quadrants ( $n = 9$  mice per group for the Nor-C, EP-C, ECoG-S groups,  $n = 10$  mice for the ultraHOCIs-S group). Data are presented as the mean  $\pm$  s.d.  $P$  values were analysed by one-way ANOVA with Tukey's post-hoc test.

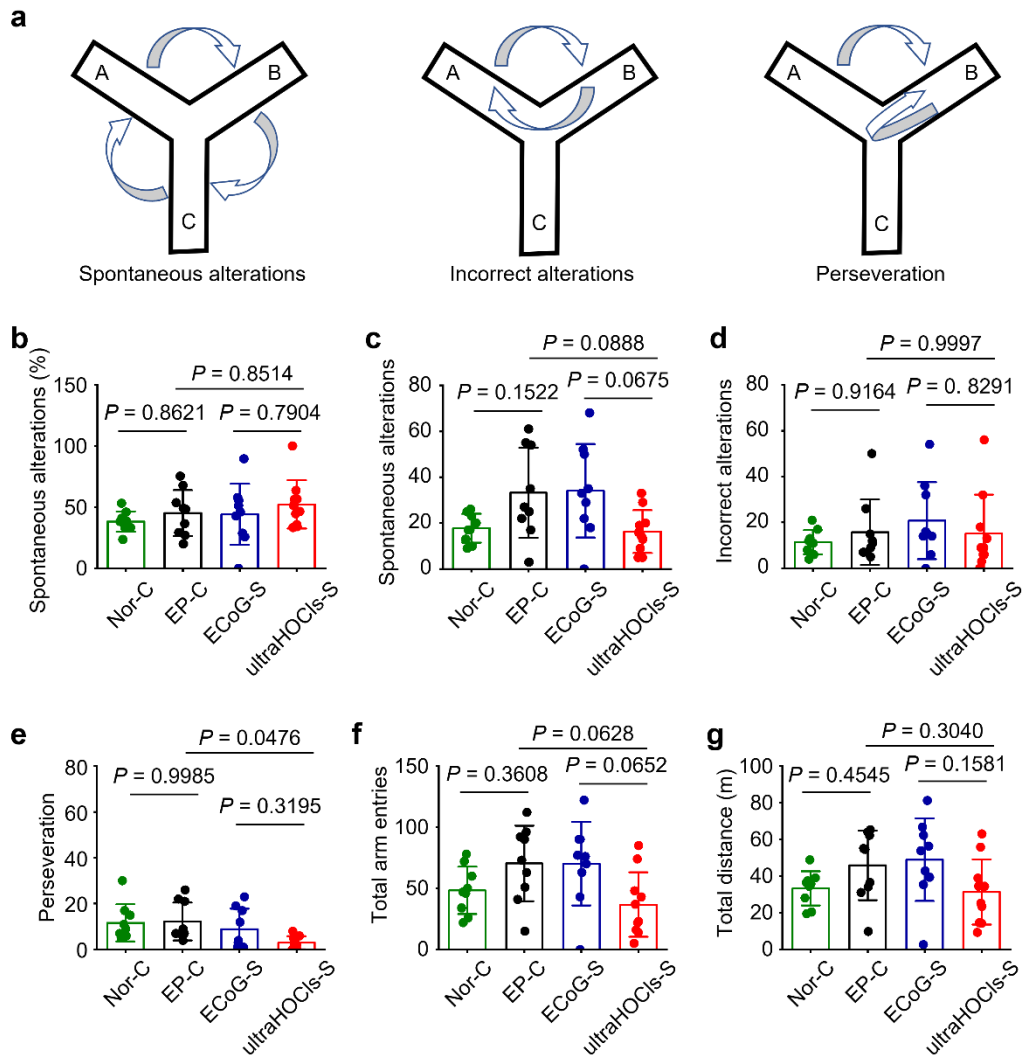

**Supplementary figure 41 | No obvious prefrontal cortex-dependent cognitive impairment in the Y-maze test after treatment of ultraHOCIs-guided surgery.** **a**, Schematic illustration of the spontaneous alternation (correct alternation), incorrect alternation and perseveration in the Y-maze test. **b–g**, Quantification of the percentage of spontaneous alternation (**b**), spontaneous alternation (**c**), the number of incorrect alternations (**d**), the number of perseveration (**e**), the total number of arm entries (**f**), and total distance (**g**) in the 5-min Y-maze test ( $n = 9$  mice per group for the Nor-C, EP-C, ECoG-S groups,  $n = 10$  mice for the ultraHOCIs-S group). Data are presented as the mean  $\pm$  s.d.  $P$  values were analysed by one-way ANOVA with Tukey's post-hoc test.



**Supplementary Table 1** Baseline characteristics of patients with intractable epilepsy involved in the study. Clinical and neuropathological information includes Age, age at surgery (years); Duration, epilepsy history duration (years); Gender of the patients; Location, Location of resected tissues; Histology and antiseizure drugs used of the patients. FCD IIa, Focal cortical dysplasia type IIa.

| Patient | Age | Duration | Gender | Location                                           | Histology                                    |
|---------|-----|----------|--------|----------------------------------------------------|----------------------------------------------|
| 1       | 22  | 6        | M      | Right occipital lobe                               | FCD IIa                                      |
| 2       | 30  | 10       | F      | Occipital-temporal junction of the left hemisphere | –                                            |
| 3       | 57  | 5        | F      | Right frontal lobe                                 | Neuron loss; Gliosis                         |
| 4       | 36  | 36       | M      | Left temporal lobe                                 | FCD IIa                                      |
| 5       | 25  | 10       | M      | Left hippocampus                                   | Hippocampal sclerosis                        |
| 6       | 36  | 8        | M      | Left temporal lobe                                 | Cystic degeneration and glial scar formation |
| 7       | 40  | 10       | F      | Right hippocampus                                  | Hippocampal sclerosis                        |
| 8       | 17  | 8        | M      | Right temporal lobe                                | Neuron disorganization; Gliosis.             |
| 9       | 39  | 6        | M      | Left temporal lobe                                 | Neuron disorganization                       |
| 10      | 51  | 30       | F      | Right temporal lobe                                | neuron loss; Nuclear pyknosis; Gliosis.      |
| 11      | 23  | 18       | M      | Right hippocampus                                  | Hippocampal sclerosis                        |
| 12      | 20  | 8        | F      | Right temporal lobe                                | FCD IIa                                      |

**Supplementary Table 2** Baseline characteristics of control patients without a history of seizures involved in the study. Clinical and neuropathological information including: Age, age at surgery (years); Gender of the patients; Location, Location of resected tissues; Histology of the patients.

| Patient | Age | Gender | Location                         | Histology                     |
|---------|-----|--------|----------------------------------|-------------------------------|
| 1       | 49  | M      | Bilateral frontal lobes          | Glioblastoma (WHO IV)         |
| 2       | 20  | M      | Right side of the hypothalamus   | Glioblastoma (WHO IV)         |
| 3       | 47  | M      | Left thalamus                    | Glioblastoma (WHO IV)         |
| 4       | 59  | F      | Right forehead and temporal lobe | Glioblastoma (WHO IV)         |
| 5       | 24  | F      | Cerebellar vermis                | Pilocytic astrocytoma (WHO I) |
| 6       | 46  | F      | Right cingulate gyrus            | Glioblastoma (WHO IV)         |
| 7       | 22  | F      | Lateral ventricle                | Central neurocytoma (WHO II)  |
| 8       | 27  | F      | Right temporal lobe              | Cavernous hemangioma          |
| 9       | 55  | M      | Right temporal lobe              | Old hemorrhage with gliosis   |
| 10      | 36  | F      | Brainstem                        | Cavernous hemangioma          |
| 11      | 32  | F      | Left temporal lobe               | Arteriovenous malformation    |
| 12      | 16  | M      | Left occipital lobe              | Arteriovenous malformation    |

**Supplementary Table 3** Sequences of primers used in RT-PCR experiments.

| Gene name    | Forward primer (5'–3')   | Reversed primer (5'–3') |
|--------------|--------------------------|-------------------------|
| For human    |                          |                         |
| GAPDH        | GTCTCCTCTGACTTCAACAGCG   | ACCACCCTGTTGCTGTAGCCAA  |
| MPO          | CCCATGGAACTCCTATCCTA     | CTAGGAGGAGTCACTAGTGG    |
| CD86         | CCATCAGCTTGTCTGTTTCATTCC | GCTGTAATCCAAGGAATGTGGTC |
| iNOS         | AGTCGAAAAGTCTGAGGCTCCG   | TGCCTTGAGAACTTCGGGAC    |
| IL-6         | TTCGGTCCAGTTGCCTTCTC     | CACCTCCTTTCTCAGGGCTG    |
| CD206        | TTAAGGGGGATCTGGGGAGG     | CCATTCGCTCCCAAGTCAGT    |
| Arg-1        | CTTGATTGGGGAGAGGCAGG     | AACAGAAGACTTGCCCTGGG    |
| TGF- $\beta$ | TACCTGAACCCGTGTTGCTCTC   | GTTGCTGAGGTATCGCCAGGAA  |
| For mouse    |                          |                         |
| GAPDH        | AGGTCGGTGTGAACGGATTTG    | TGTAGACCATGTAGTTGAGGTCA |
| MPO          | CGTGTCAAGTGGCTGTGCCTAT   | AACCAGCGTACAAAGGCACGGT  |
| CD86         | TGTTTCCGTGGAGACGCAAG     | TTGAGCCTTTGTAAATGGGCA   |
| IL-6         | TAGTCCTTCCTACCCCAATTTCC  | TTGGTCCTTAGCCACTCCTTC   |
| iNOS         | GTTCTCAGCCCAACAATACAAGA  | GTGGACGGGTCGATGTCAC     |
| CD206        | CTCTGTTTCTGCTATTGGACGC   | CGGAATTTCTGGGATTCTGCTTC |
| Arg-1        | CTCCAAGCCAAAGTCCTTAGAG   | AGGAGCTGTCATTAGGGACATC  |
| TGF- $\beta$ | CTCCCGTGGCTTCTAGTGC      | GCCTTAGTTTGGACAGGATCTG  |

**Supplementary Table 4** Antibodies used for immunofluorescence studies, flow cytometric assays and immunoblotting studies in the study.

| Antibodies                                                                 | Source            | Identifier                         |
|----------------------------------------------------------------------------|-------------------|------------------------------------|
| Immunofluorescence antibodies                                              |                   |                                    |
| Goat ionised calcium-binding adaptor molecule 1 (Iba1) polyclonal antibody | Novus Biologicals | Cat# NB100-1028<br>RRID: AB_521594 |
| Recombinant anti-myeloperoxidase antibody                                  | Abcam             | Cat# ab208670<br>RRID: AB_2864724  |
| Recombinant anti-CD163 antibody                                            | Abcam             | Cat# ab182422<br>RRID: AB_2753196  |
| Recombinant anti-iNOS antibody                                             | Abcam             | Cat# ab178945<br>RRID: AB_2861417  |
| Flow cytometric antibodies                                                 |                   |                                    |
| PE anti-human CD45 antibody                                                | Biolegend         | Cat# 368510<br>RRID: AB_2566370    |
| APC anti-human CD11b antibody                                              | Biolegend         | Cat# 301309<br>RRID: AB_314161     |
| FITC anti-human CD206 antibody                                             | Biolegend         | Cat# 321103<br>RRID: AB_571904     |
| PerCP/Cyanine5.5 anti-human CD86 antibody                                  | Biolegend         | Cat# 305419<br>RRID: AB_1575070    |
| PE/Cyanine7 anti-mouse CD45 antibody                                       | Biolegend         | Cat# 103114<br>RRID: AB_312979     |
| PerCP/Cyanine5.5 anti-mouse/human CD11b antibody                           | Biolegend         | Cat# 101227<br>RRID: AB_2565948    |
| Alexa Fluor® 488 anti-mouse CD206 antibody                                 | Biolegend         | Cat# 141710<br>RRID: AB_893232     |
| PE anti-mouse CD86                                                         | Biolegend         | Cat# 105007<br>RRID: AB_313150     |
| Immunoblotting antibodies                                                  |                   |                                    |
| Recombinant anti-myeloperoxidase antibody                                  | Abcam             | Cat# ab208670<br>RRID: AB_2864724  |
| Anti-GAPDH antibody-loading control                                        | Abcam             | Cat# ab70699<br>RRID: AB_1209569   |

**Supplementary Table 5** Definition of gait parameters involved in Catwalk gait analysis.

| Parameters                 | Definition                                                                                                     |
|----------------------------|----------------------------------------------------------------------------------------------------------------|
| Print position             | The distance between the position of the hind paw and the previously placed front paw on the ipsilateral side. |
| Cadence                    | Step numbers per second.                                                                                       |
| Print area                 | Total surface area of a print.                                                                                 |
| Stand                      | The duration that a paw in contact with glass plate.                                                           |
| Maximum variation          | The maximum variation in running speed.                                                                        |
| Number of steps            | Total step numbers during a run.                                                                               |
| Stand index                | The parameter for describing the speed at which the paw loses contact with the glass plate.                    |
| Swing                      | The duration that a paw does not in contact with glass plate.                                                  |
| Step cycle                 | The sum duration of Stand and Swing.                                                                           |
| Duty cycle                 | The percentage of Stand in Step Cycle.                                                                         |
| Stride length              | The distance between successive positions of the same claw.                                                    |
| Max intensity              | The maximum intensity of the complete paw.                                                                     |
| Mean intensity             | The mean intensity of the complete paw.                                                                        |
| Max contact max intensity  | The maximum intensity of a paw when it achieves maximum contact with the glass plate.                          |
| Max contact mean intensity | The mean intensity of a paw when it achieves maximum contact with the glass plate.                             |

## References

1. Zhang, Y. et al. Noninvasively Imaging Subcutaneous Tumor Xenograft by a Handheld Raman Detector, with the Assistance of an Optical Clearing Agent. *ACS Applied Materials & Interfaces* **9**, 17769–17776 (2017).
2. Gao, X. et al. Guiding brain-tumor surgery via blood-brain-barrier-permeable gold nanoprobes with acid-triggered MRI/SERRS signals. *Advanced Materials* **29**, 1603917 (2017).
3. Wang, C. et al. An electric-field-responsive paramagnetic contrast agent enhances the visualization of epileptic foci in mouse models of drug-resistant epilepsy. *Nature Biomedical Engineering* **5**, 278–289 (2021).
