# Supplementary material for: Guiding Epilepsy Surgery by Intraoperatively Visualizing Proinflammatory Microglia via a Ratiometric Surface-Enhanced Raman Scattering Nanosensor
Source: Research Square preprint supplement (doi:10.21203/rs.3.rs-1868381/v1), 2023-02-15
Supplement: Supplementary file 1 [file e0d6d4db773eb6d62f19ae5a.docx]

% CURVE_LEN_CALC.M Compute the total length for signal curves

%

% Author: Xingyu Zhou

% Implemented in MATLAB R2019b

%% Initialization

clc;

clear all;

close all;

% Replace the following line with actual directory containing XLSX files

data_dir = 'D:\data\';

% Replace the content of FILE_LIST with actual list of XLSX files to read

file_list = {...

'Acute_figure4_4.xlsx', ...

'Chronic_figure4_4.xlsx', ...

'Control_figure4_4.xlsx', ...

'ECoG_figure7_4.xlsx', ...

'Raman_figure7_4.xlsx', ...

'Sham_figure7_4.xlsx'};

%% Load data from XLSX files and compute curve length

for kf = 1 : length(file_list)

data_file = file_list{kf};

fprintf('\nData file: %s\n', data_file);

fread = sprintf('%s/%s', data_dir, data_file);

sheets = sheetnames(fread);

for ks = 1 : length(sheets)

curv_vec = readmatrix(fread, 'Sheet', ks);

curv_len = sum(sqrt(sum(diff(curv_vec) .^ 2, 2)));

fprintf(' Sheet: %s\t\t', sheets(ks));

fprintf('Curve length: %.3f\n', curv_len);

end

end
